# Supplementary material for: Plasma-Targeted Proteomic and Lipidomic Profiling of MASLD, MASH, and Hepatitis C Virus Infection
Source: Research Square preprint supplement (doi:10.21203/rs.3.rs-7675910/v1), 2025-10-10
Supplement: Supplementary file 1 [file 25b581d8e7f6b4dd0cd0d2ca.xlsx]

## Sheet: TableS1
Table S1: Subject demographic characteristics
			Cohort 1	Cohort 2		Cohort 3
			proteomics	proteomics	lipidomics	proteomics	lipidomics
	N	HCV	─	70	92	72	96
		MASLD	35	77	81	114	94
		MASH	53	39	30	68	41
		Total	88	186	203	254	231
	Female %	HCV	─	57.1	64.1	55.6	62.5
		MASLD	54.3	55.8	53.1	58.8	54.3
		MASH	73.6	59	60	66.2	73.2
		Total	65.9	57	59.1	59.8	60.4
	Age (years) Mean ±SD*	HCV	─	67.9 + 11.7	68.8 + 12.1	72.2 + 11.7	72.5 ± 12.0
		MASLD	57.1 ±11.9	59.6 + 12.9	59.9 + 12.5	61.5 + 12.7	62.9 + 12.1
		MASH	58.3 ±12.4	56.5 + 16.1	62.6 + 17.3	69.2 + 13.6	65.4 + 15.7
		Total	57.8 + 12.1	62.1 + 14.0	64.3 + 13.7	64.9 + 13.4	67.4 + 13.5
	Age (years) Median	HCV	─	70	70.5	74.5	75
		MASLD	60	62	62	64	64
		MASH	62	59	61,5	65.5	67
		Total	61.5	65	67	67.5	70
	Age (years) Range	HCV	─	27-86	27-91	31-89	31-94
		MASLD	39-77	24-84	24-84	27-89	27-89
		MASH	29-79	28-85	22-85	33-89	29-89
		Total	29-79	24-86	22-91	27-89	27-89
	*SD indicates Standard Deviation

## Sheet: TableS2
Table S2: MRM transitions for phospholipid measurements
	Lipid ID	Lipid Name	Lipid class	Polarity	Q1 (m/z)	Q3 (m/z)	CE	Integration Start Time	Integration End Time
	Lipid_0003	LPC_12:0	PC	Positive	440.3	184.1	26	4.11	4.674
	Lipid_0006	LPC_14:0	PC	Positive	468.3	184.1	26	4.798	5.434
	Lipid_0010	LPC_15:0	PC	Positive	482.3	184.1	26	5.182	5.887
	Lipid_0011	LPC_O-16:0	PC	Positive	482.3	184.1	26	6.142	6.64
	Lipid_0015	LPC_16:1	PC	Positive	494.3	184.1	26	5.006	5.921
	Lipid_0016	LPC_16:0	PC	Positive	496.3	184.1	8	5.583	6.421
	Lipid_0021	LPC_17:1	PC	Positive	508.3	184.1	26	5.376	6.175
	Lipid_0022	LPC_O-18:1	PC	Positive	508.3	184.1	26	6.325	6.944
	Lipid_0023	LPC_17:0	PC	Positive	510.4	184.1	26	5.878	6.773
	Lipid_0024	LPC_O-18:0	PC	Positive	510.4	184.1	26	6.995	7.535
	Lipid_0025	LPC_18:3	PC	Positive	518.3	184.1	26	4.738	5.788
	Lipid_0026	LPC_18:2	PC	Positive	520.3	184.1	8	5.141	6.065
	Lipid_0029	LPC_18:1	PC	Positive	522.4	184.1	8	5.833	6.611
	Lipid_0030	LPC_18:0	PC	Positive	524.4	184.1	8	6.385	7.268
	Lipid_0032	LPC_19:0	PC	Positive	538.3	184.1	26	6.67	7.757
	Lipid_0037	LPC_20:5	PC	Positive	542.3	184.1	12	4.745	5.818
	Lipid_0039	LPC_20:4	PC	Positive	544.3	184.1	12	5.347	6.019
	Lipid_0041	LPC_20:3	PC	Positive	546.4	184.1	26	5.717	6.376
	Lipid_0042	LPC_20:2	PC	Positive	548.4	184.1	26	6.147	6.975
	Lipid_0044	LPC_20:1	PC	Positive	550.4	184.1	26	6.528	7.386
	Lipid_0045	LPC_20:0	PC	Positive	552.4	184.1	26	7.324	8.04
	Lipid_0048	LPC_22:6	PC	Positive	568.3	184.1	12	5.214	5.971
	Lipid_0051	LPC_22:5	PC	Positive	570.4	184.1	26	5.598	6.325
	Lipid_0052	LPC_22:4	PC	Positive	572.4	184.1	26	5.956	6.596
	Lipid_0054	LPC_22:1	PC	Positive	578.4	184.1	26	7.355	8.201
	Lipid_0055	LPC_22:0	PC	Positive	580.4	184.1	26	8.152	9.007
	Lipid_0062	LPC_24:1	PC	Positive	606.4	184.1	26	8.262	9.037
	Lipid_0063	LPC_24:0	PC	Positive	608.4	184.1	26	9.109	9.8
	Lipid_0107	PC_O-32:2	PC	Positive	716.5	184.1	15	10.611	11.426
	Lipid_0110	PC_31:1	PC	Positive	718.5	184.1	15	9.807	10.244
	Lipid_0111	PC_O-32:1	PC	Positive	718.5	184.1	15	11.313	12.075
	Lipid_0114	PC_31:0	PC	Positive	720.5	184.1	15	10.23	11.145
	Lipid_0115	PC_O-32:0	PC	Positive	720.5	184.1	15	11.275	12.171
	Lipid_0141	PC_32:2	PC	Positive	730.5	184.1	15	9.615	10.197
	Lipid_0147	PC_32:1	PC	Positive	732.6	184.1	15	10.268	10.822
	Lipid_0150	PC_32:0	PC	Positive	734.6	184.1	15	10.883	11.414
	Lipid_0164	PC_O-34:3	PC	Positive	742.5	184.1	15	10.722	11.637
	Lipid_0168	PC_33:2	PC	Positive	744.6	184.1	15	9.949	10.634
	Lipid_0169	PC_O-34:2_peak1	PC	Positive	744.6	184.1	15	10.82	11.398
	Lipid_0170	PC_O-34:2_peak2	PC	Positive	744.6	184.1	15	11.373	12.106
	Lipid_0176	PC_33:1	PC	Positive	746.6	184.1	15	10.393	11.088
	Lipid_0177	PC_O-34:1	PC	Positive	746.6	184.1	15	11.331	12.198
	Lipid_0190	PC_33:0	PC	Positive	748.6	184.1	35	10.902	11.714
	Lipid_0191	PC_O-34:0	PC	Positive	748.6	184.1	35	12.206	13.189
	Lipid_0205	PC_34:4	PC	Positive	754.5	184.1	35	9.4	10.268
	Lipid_0214	PC_34:3	PC	Positive	756.65	184.1	15	9.814	10.646
	Lipid_0216	PC_34:2	PC	Positive	758.6	184.1	8	10.273	11.266
	Lipid_0220	PC_34:1	PC	Positive	760.6	184.1	8	10.927	11.69
	Lipid_0227	PC_34:0	PC	Positive	762.6	184.1	15	11.719	12.195
	Lipid_0228	PC_O-36:6	PC	Positive	764.5	184.1	35	9.802	11.091
	Lipid_0239	PC_35:5	PC	Positive	766.5	184.1	15	9.422	10.039
	Lipid_0240	PC_O-36:5	PC	Positive	766.5	184.1	15	10.442	11.607
	Lipid_0247	PC_35:4	PC	Positive	768.6	184.1	15	9.86	10.545
	Lipid_0248	PC_O-36:4	PC	Positive	768.6	184.1	15	10.785	11.727
	Lipid_0251	PC_35:3	PC	Positive	770.6	184.1	15	9.84	10.784
	Lipid_0252	PC_O-36:3	PC	Positive	770.6	184.1	15	11.061	12.253
	Lipid_0255	PC_35:2	PC	Positive	772.6	184.1	15	10.65	11.367
	Lipid_0256	PC_O-36:2	PC	Positive	772.6	184.1	15	11.472	12.943
	Lipid_0266	PC_35:1	PC	Positive	774.6	184.1	15	11.229	12.088
	Lipid_0276	PC_36:7	PC	Positive	776.6	184.1	35	10.089	10.805
	Lipid_0277	PC_O-36:0	PC	Positive	776.6	184.1	35	13.089	13.879
	Lipid_0278	PC_36:6	PC	Positive	778.5	184.1	35	9.29	10.012
	Lipid_0282	PC_36:5	PC	Positive	780.6	184.1	10	9.897	10.595
	Lipid_0285	PC_36:4	PC	Positive	782.6	184.1	10	9.987	11.144
	Lipid_0288	PC_36:3	PC	Positive	784.6	184.1	10	10.623	11.459
	Lipid_0294	PC_36:2	PC	Positive	786.6	184.1	10	11.06	12.012
	Lipid_0306	PC_36:1	PC	Positive	788.6	184.1	10	11.714	12.495
	Lipid_0320	PC_37:6	PC	Positive	792.6	184.1	15	9.715	10.363
	Lipid_0321	PC_O-38:6	PC	Positive	792.6	184.1	15	10.561	11.579
	Lipid_0325	PC_37:5	PC	Positive	794.6	184.1	15	10.121	10.814
	Lipid_0326	PC_O-38:5	PC	Positive	794.6	184.1	15	10.856	12.023
	Lipid_0328	PC_37:4	PC	Positive	796.6	184.1	15	10.639	11.451
	Lipid_0329	PC_O-38:4	PC	Positive	796.6	184.1	15	11.437	12.518
	Lipid_0331	PC_37:3	PC	Positive	798.6	184.1	15	10.422	10.799
	Lipid_0332	PC_O-38:3	PC	Positive	798.6	184.1	15	10.749	13.142
	Lipid_0340	PC_37:2	PC	Positive	800.6	184.1	15	11.442	12.165
	Lipid_0346	PC_38:7	PC	Positive	804.6	184.1	15	9.134	10.566
	Lipid_0351	PC_38:6	PC	Positive	806.6	184.1	10	10.065	10.813
	Lipid_0356	PC_38:5	PC	Positive	808.6	184.1	10	10.509	11.237
	Lipid_0363	PC_38:4_peak1	PC	Positive	810.6	184.1	10	10.736	11.287
	Lipid_0364	PC_38:4_peak2	PC	Positive	810.6	184.1	10	11.212	11.797
	Lipid_0370	PC_38:3	PC	Positive	812.6	184.1	15	11.515	12.009
	Lipid_0373	PC_38:2	PC	Positive	814.6	184.1	15	11.989	12.54
	Lipid_0384	PC_39:7	PC	Positive	818.6	184.1	15	10.086	10.7
	Lipid_0385	PC_O-40:7	PC	Positive	818.6	184.1	15	10.728	11.935
	Lipid_0386	PC_39:6	PC	Positive	820.6	184.1	15	10.421	11.149
	Lipid_0387	PC_O-40:6	PC	Positive	820.6	184.1	15	11.067	12.491
	Lipid_0400	PC_40:8	PC	Positive	830.6	184.1	15	9.763	10.644
	Lipid_0407	PC_40:7	PC	Positive	832.6	184.1	15	10.16	11.03
	Lipid_0412	PC_40:6	PC	Positive	834.6	184.1	10	10.704	11.676
	Lipid_0418	PC_40:5	PC	Positive	836.6	184.1	15	11.316	12.106
	Lipid_0419	PC_40:4	PC	Positive	838.6	184.1	15	11.738	12.66
	Lipid_0456	PC_42:7	PC	Positive	860.7	184.1	35	10.72	11.587
	Lipid_0460	PC_42:6	PC	Positive	862.7	184.1	35	11.477	12.511
	Lipid_0462	PC_42:5	PC	Positive	864.7	184.1	35	11.602	13.037
	Lipid_0463	PC_42:4	PC	Positive	866.7	184.1	35	12.397	13.469
	Lipid_0471	PC_44:12	PC	Positive	878.7	184.1	35	13.192	14.178
	Lipid_0472	PC_44:11	PC	Positive	880.7	184.1	35	14.262	14.939
	Lipid_0036	LPC_16:0_FA_16:0	PC	Negative	540.3	255.2	33	5.503	6.551
	Lipid_0046	LPC_18:2_FA_18:2	PC	Negative	564.3	279.2	33	5.105	6.224
	Lipid_0047	LPC_18:1_FA_18:1	PC	Negative	566.3	281.2	33	5.76	6.927
	Lipid_0050	LPC_18:0_FA_18:0	PC	Negative	568.4	283.3	33	6.333	7.334
	Lipid_0229	PC_15:0_16:0_FA_16:0	PC	Negative	764.5	255.2	31	9.908	10.368
	Lipid_0230	PC_O-32:0_FA_16:0	PC	Negative	764.5	255.2	31	11.289	12.061
	Lipid_0259	PC_14:0_18:2_FA_14:0	PC	Negative	774.5	227.2	38	9.676	10.192
	Lipid_0260	PC_14:0_18:2_FA_18:2	PC	Negative	774.5	279.2	40	9.677	10.192
	Lipid_0268	PC_14:0_18:1_FA_14:0	PC	Negative	776.5	227.2	35	10.232	10.691
	Lipid_0269	PC_16:0_16:1_FA_16:1	PC	Negative	776.5	253.2	35	10.331	10.758
	Lipid_0270	PC_16:0_16:1_FA_16:0	PC	Negative	776.5	255.2	35	10.206	10.759
	Lipid_0271	PC_14:0_18:1_FA_18:1	PC	Negative	776.5	281.2	35	10.232	10.691
	Lipid_0298	PC_15:0_18:2_FA_15:0	PC	Negative	788.5	241.2	41	9.895	10.767
	Lipid_0299	PC_15:0_18:2_FA_18:2	PC	Negative	788.5	279.2	37	9.895	10.767
	Lipid_0300	PC_O-34:2_FA_18:2	PC	Negative	788.5	279.2	37	10.675	11.859
	Lipid_0302	PC_O-34:2_FA_18:1	PC	Negative	788.5	281.2	37	11.423	12.13
	Lipid_0315	PC_15:0_18:1_FA_15:0	PC	Negative	790.6	241.2	41	10.439	11.225
	Lipid_0316	PC_16:0_17:1_FA_16:0	PC	Negative	790.6	255.2	43	10.289	11.292
	Lipid_0317	PC_16:0_17:1_FA_17:1	PC	Negative	790.6	267.2	41	10.289	11.292
	Lipid_0318	PC_15:0_18:1_FA_18:1	PC	Negative	790.6	281.2	41	10.439	11.225
	Lipid_0336	PC_16:1_18:2_FA_16:1	PC	Negative	800.5	253.2	40	9.807	10.724
	Lipid_0337	PC_16:0_18:3_FA_16:0	PC	Negative	800.5	255.2	43	9.875	10.829
	Lipid_0338	PC_16:0_18:3_FA_18:3	PC	Negative	800.5	277.2	36	9.875	10.829
	Lipid_0339	PC_16:1_18:2_FA_18:2	PC	Negative	800.5	279.2	40	9.807	10.724
	Lipid_0342	PC_16:1_18:1_FA_16:1	PC	Negative	802.6	253.2	40	10.292	11.126
	Lipid_0343	PC_16:0_18:2_FA_16:0	PC	Negative	802.6	255.2	43	10.372	11.084
	Lipid_0344	PC_16:0_18:2_FA_18:2	PC	Negative	802.6	279.2	40	10.372	11.084
	Lipid_0345	PC_16:1_18:1_FA_18:1	PC	Negative	802.6	281.2	41	10.292	11.126
	Lipid_0347	PC_16:1_18:0_FA_16:1	PC	Negative	804.6	253.2	40	10.95	11.764
	Lipid_0348	PC_16:0_18:1_FA_16:0	PC	Negative	804.6	255.2	43	10.869	11.903
	Lipid_0349	PC_16:0_18:1_FA_18:1	PC	Negative	804.6	281.2	41	10.869	11.903
	Lipid_0350	PC_16:1_18:0_FA_18:0	PC	Negative	804.6	283.3	43	10.95	11.764
	Lipid_0354	PC_16:0_18:0_FA_16:0	PC	Negative	806.6	255.2	43	11.682	12.394
	Lipid_0355	PC_16:0_18:0_FA_18:0	PC	Negative	806.6	283.3	43	11.682	12.394
	Lipid_0359	PC_15:0_20:5_FA_15:0	PC	Negative	810.5	241.2	46	9.461	10.173
	Lipid_0360	PC_15:0_20:5_FA_20:5	PC	Negative	810.5	301.2	33	9.461	10.173
	Lipid_0361	PC_O-36:5_FA_20:5	PC	Negative	810.5	301.2	33	10.362	11.087
	Lipid_0362	PC_O-36:5_FA_20:4	PC	Negative	810.5	303.2	35	10.753	11.417
	Lipid_0369	PC_15:0_20:4_FA_15:0	PC	Negative	812.5	241.2	35	9.966	10.622
	Lipid_0376	PC_17:1_18:1_FA_17:1	PC	Negative	816.6	267.2	41	10.657	11.505
	Lipid_0377	PC_17:0_18:2_FA_17:0	PC	Negative	816.6	269.2	43	10.657	11.586
	Lipid_0378	PC_17:0_18:2_FA_18:2	PC	Negative	816.6	279.2	40	10.657	11.586
	Lipid_0379	PC_O-36:2_FA_18:2	PC	Negative	816.6	279.2	40	11.735	12.417
	Lipid_0380	PC_17:1_18:1_FA_18:1	PC	Negative	816.6	281.2	41	10.657	11.505
	Lipid_0381	PC_O-36:2_FA_18:1_peak1	PC	Negative	816.6	281.2	41	11.577	12.115
	Lipid_0382	PC_O-36:2_FA_18:1_peak2	PC	Negative	816.6	281.2	41	12.247	12.854
	Lipid_0388	PC_16:0_20:5_FA_16:0	PC	Negative	824.5	255.2	45	9.917	10.625
	Lipid_0389	PC_16:0_20:5_FA_20:5	PC	Negative	824.5	301.2	33	9.917	10.625
	Lipid_0390	PC_16:0_20:4_FA_16:0	PC	Negative	826.6	255.2	43	10.275	11.083
	Lipid_0391	PC_18:2_18:2_FA_18:2	PC	Negative	826.6	279.2	40	9.943	10.63
	Lipid_0392	PC_16:0_20:4_FA_20:4	PC	Negative	826.6	303.2	35	10.275	11.083
	Lipid_0393	PC_16:0_20:3_FA_16:0	PC	Negative	828.6	255.2	43	10.69	11.402
	Lipid_0394	PC_18:0_18:3_FA_18:3	PC	Negative	828.6	277.2	36	10.787	11.437
	Lipid_0395	PC_18:1_18:2_FA_18:2	PC	Negative	828.6	279.2	40	10.484	11.387
	Lipid_0396	PC_18:1_18:2_FA_18:1	PC	Negative	828.6	281.2	41	10.484	11.387
	Lipid_0397	PC_18:0_18:3_FA_18:0	PC	Negative	828.6	283.3	43	10.787	11.437
	Lipid_0399	PC_16:0_20:3_FA_20:3	PC	Negative	828.6	305.2	38	10.69	11.402
	Lipid_0401	PC_16:0_20:2_FA_16:0	PC	Negative	830.6	255.2	43	11.155	11.888
	Lipid_0402	PC_18:0_18:2_FA_18:2	PC	Negative	830.6	279.2	40	11.172	12.114
	Lipid_0403	PC_18:1_18:1_FA_18:1	PC	Negative	830.6	281.2	41	11.064	11.879
	Lipid_0404	PC_18:0_18:2_FA_18:0	PC	Negative	830.6	283.3	43	11.172	12.114
	Lipid_0405	PC_16:0_20:2_FA_20:2	PC	Negative	830.6	307.3	42	11.155	11.888
	Lipid_0408	PC_16:0_20:1_FA_16:0	PC	Negative	832.6	255.2	43	11.737	12.48
	Lipid_0409	PC_18:0_18:1_FA_18:1	PC	Negative	832.6	281.2	41	11.785	12.578
	Lipid_0410	PC_18:0_18:1_FA_18:0	PC	Negative	832.6	283.3	43	11.785	12.578
	Lipid_0411	PC_16:0_20:1_FA_20:1	PC	Negative	832.6	309.3	44	11.737	12.48
	Lipid_0415	PC_15:0_22:6_FA_15:0	PC	Negative	836.5	241.2	41	9.579	10.429
	Lipid_0416	PC_15:0_22:6_FA_22:6	PC	Negative	836.5	327.2	33	9.579	10.429
	Lipid_0417	PC_O-38:6_FA_22:6	PC	Negative	836.5	327.2	33	10.647	11.29
	Lipid_0421	PC_17:0_20:4_FA_17:0	PC	Negative	840.6	269.2	43	10.483	11.47
	Lipid_0424	PC_16:0_22:6_FA_16:0	PC	Negative	850.6	255.2	43	10.188	10.886
	Lipid_0425	PC_18:2_20:4_FA_18:2	PC	Negative	850.6	279.2	39	9.931	10.593
	Lipid_0426	PC_18:1_20:5_FA_18:1	PC	Negative	850.6	281.2	39	10.057	10.679
	Lipid_0427	PC_18:1_20:5_FA_20:5	PC	Negative	850.6	301.2	39	10.057	10.679
	Lipid_0428	PC_18:2_20:4_FA_20:4	PC	Negative	850.6	303.2	35	9.931	10.593
	Lipid_0429	PC_16:0_22:6_FA_22:6	PC	Negative	850.6	327.2	33	10.188	10.886
	Lipid_0430	PC_16:0_22:5_FA_16:0	PC	Negative	852.6	255.2	43	10.531	11.247
	Lipid_0431	PC_18:2_20:3_FA_18:2	PC	Negative	852.6	279.2	40	10.267	11.017
	Lipid_0432	PC_18:1_20:4_FA_18:1	PC	Negative	852.6	281.2	41	10.392	11.48
	Lipid_0433	PC_18:0_20:5_FA_18:0	PC	Negative	852.6	283.3	43	10.688	11.342
	Lipid_0434	PC_18:0_20:5_FA_20:5	PC	Negative	852.6	301.2	33	10.688	11.342
	Lipid_0435	PC_18:1_20:4_FA_20:4	PC	Negative	852.6	303.2	35	10.392	11.48
	Lipid_0436	PC_18:2_20:3_FA_20:3	PC	Negative	852.6	305.2	38	10.267	11.017
	Lipid_0437	PC_16:0_22:5_FA_22:5	PC	Negative	852.6	329.2	36	10.531	11.247
	Lipid_0438	PC_16:0_22:4_FA_16:0	PC	Negative	854.6	255.2	43	10.927	11.651
	Lipid_0439	PC_18:1_20:3_FA_18:1	PC	Negative	854.6	281.2	41	10.78	11.553
	Lipid_0440	PC_18:0_20:4_FA_18:0	PC	Negative	854.6	283.3	43	11.149	11.909
	Lipid_0441	PC_18:0_20:4_FA_20:4	PC	Negative	854.6	303.2	35	11.149	11.909
	Lipid_0442	PC_18:1_20:3_FA_20:3	PC	Negative	854.6	305.2	35	10.78	11.553
	Lipid_0443	PC_16:0_22:4_FA_22:4	PC	Negative	854.6	331.3	35	10.927	11.651
	Lipid_0444	PC_18:1_20:2_FA_18:1	PC	Negative	856.6	281.2	43	11.291	11.871
	Lipid_0445	PC_18:0_20:3_FA_18:0	PC	Negative	856.6	283.3	43	11.481	12.155
	Lipid_0446	PC_18:0_20:3_FA_20:3	PC	Negative	856.6	305.2	38	11.481	12.155
	Lipid_0447	PC_18:1_20:2_FA_20:2	PC	Negative	856.6	307.3	42	11.291	11.871
	Lipid_0450	PC_18:2_20:0_FA_18:2	PC	Negative	858.6	279.2	40	12.106	12.794
	Lipid_0451	PC_18:1_20:1_FA_18:1	PC	Negative	858.6	281.2	41	11.864	12.344
	Lipid_0452	PC_18:0_20:2_FA_18:0	PC	Negative	858.6	283.3	43	11.996	12.726
	Lipid_0453	PC_18:0_20:2_FA_20:2	PC	Negative	858.6	307.3	42	11.996	12.726
	Lipid_0454	PC_18:1_20:1_FA_20:1	PC	Negative	858.6	309.3	44	11.837	12.504
	Lipid_0455	PC_18:2_20:0_FA_20:0	PC	Negative	858.6	311.3	45	12.106	12.794
	Lipid_0464	PC_18:2_22:6_FA_18:2	PC	Negative	874.6	279.2	40	9.776	10.358
	Lipid_0465	PC_20:4_20:4_FA_20:4	PC	Negative	874.6	303.2	35	9.792	10.391
	Lipid_0466	PC_18:1_22:6_FA_18:1	PC	Negative	876.6	281.2	41	10.371	11.004
	Lipid_0467	PC_18:1_22:6_FA_22:6	PC	Negative	876.6	327.2	33	10.371	11.004
	Lipid_0468	PC_18:0_22:6_FA_18:0	PC	Negative	878.6	283.3	43	11.068	11.764
	Lipid_0469	PC_18:0_22:6_FA_22:6	PC	Negative	878.6	327.2	33	11.068	11.764
	Lipid_0002	LPE_14:0	PE	Positive	426.3	285.3	20	5.021	5.718
	Lipid_0004	LPE_16:1	PE	Positive	452.3	311.3	20	5.214	5.794
	Lipid_0005	LPE_16:0	PE	Positive	454.3	313.3	20	5.764	6.506
	Lipid_0007	LPE_18:3	PE	Positive	476.3	335.3	20	5.086	5.707
	Lipid_0008	LPE_18:2	PE	Positive	478.3	337.3	20	5.429	6.113
	Lipid_0009	LPE_18:1	PE	Positive	480.3	339.3	20	5.961	6.716
	Lipid_0012	LPE_18:0	PE	Positive	482.3	341.3	20	6.627	7.288
	Lipid_0018	LPE_20:5	PE	Positive	500.3	359.3	20	5.051	5.513
	Lipid_0019	LPE_20:4	PE	Positive	502.3	361.3	20	5.399	6.084
	Lipid_0020	LPE_20:3	PE	Positive	504.3	363.3	20	5.835	6.523
	Lipid_0031	LPE_22:6	PE	Positive	526.3	385.3	20	5.412	6.016
	Lipid_0088	PE_32:1	PE	Positive	690.5	549.5	21	10.47	11.561
	Lipid_0090	PE_32:0	PE	Positive	692.5	551.5	21	11.168	11.727
	Lipid_0104	PE_34:3	PE	Positive	714.5	573.5	21	10.127	10.881
	Lipid_0108	PE_34:2	PE	Positive	716.5	575.5	21	10.697	11.276
	Lipid_0112	PE_34:1	PE	Positive	718.5	577.5	21	11.28	11.992
	Lipid_0117	PE_34:0	PE	Positive	720.6	579.5	21	12.051	12.641
	Lipid_0120	PE_P-16:0_20:5	PE	Positive	722.5	364.25	34	10.5	11.3
	Lipid_0121	PE_O-36:6	PE	Positive	722.5	581.5	21	10.063	11.222
	Lipid_0124	PE_P-16:0_20:4	PE	Positive	724.5	364.25	34	10.961	11.784
	Lipid_0125	PE_O-36:5	PE	Positive	724.5	583.5	21	10.774	11.777
	Lipid_0129	PE_P-18:1_18:2	PE	Positive	726.5	390.3	34	11.195	11.959
	Lipid_0130	PE_O-36:4	PE	Positive	726.5	585.5	21	11.22	11.976
	Lipid_0136	PE_P-18:1_18:1	PE	Positive	728.5	390.3	34	11.696	12.865
	Lipid_0137	PE_P-18:0_18:2	PE	Positive	728.5	392.3	34	11.961	12.672
	Lipid_0138	PE_O-36:3	PE	Positive	728.5	587.5	21	11.966	12.593
	Lipid_0143	PE_P-18:0_18:1	PE	Positive	730.5	392.3	34	12.534	13.28
	Lipid_0144	PE_O-36:2	PE	Positive	730.5	589.5	21	11.715	13.219
	Lipid_0148	PE_O-36:1	PE	Positive	732.6	591.5	21	12.612	13.219
	Lipid_0157	PE_36:5	PE	Positive	738.5	597.5	21	9.843	10.796
	Lipid_0161	PE_36:4	PE	Positive	740.5	599.5	21	10.275	11.109
	Lipid_0167	PE_36:3	PE	Positive	742.5	601.5	21	10.85	11.521
	Lipid_0173	PE_36:2	PE	Positive	744.6	603.5	21	11.421	12.136
	Lipid_0181	PE_36:1	PE	Positive	746.6	605.6	21	12.096	12.676
	Lipid_0186	PE_P-16:0_22:6	PE	Positive	748.5	364.25	34	10.833	11.6
	Lipid_0187	PE_P-18:1_20:5	PE	Positive	748.5	390.3	34	10.466	11.472
	Lipid_0189	PE_O-38:7	PE	Positive	748.5	607.5	21	10.533	11.575
	Lipid_0196	PE_P-16:0_22:5	PE	Positive	750.5	364.25	34	11.213	11.922
	Lipid_0197	PE_P-18:1_20:4	PE	Positive	750.5	390.3	34	10.89	12.014
	Lipid_0198	PE_P-18:0_20:5	PE	Positive	750.5	392.3	34	11.312	12.057
	Lipid_0199	PE_O-38:6	PE	Positive	750.5	609.5	21	10.764	11.979
	Lipid_0202	PE_P-18:1_20:3	PE	Positive	752.5	390.3	34	11.097	12.133
	Lipid_0203	PE_P-18:0_20:4	PE	Positive	752.5	392.3	34	11.819	12.481
	Lipid_0204	PE_O-38:5	PE	Positive	752.5	611.5	21	11.133	12.524
	Lipid_0208	PE_P-18:0_20:3	PE	Positive	754.5	392.3	34	12.302	12.937
	Lipid_0209	PE_O-38:4	PE	Positive	754.5	613.5	21	11.544	12.889
	Lipid_0238	PE_38:6	PE	Positive	764.5	623.5	21	10.254	11.255
	Lipid_0245	PE_38:5	PE	Positive	766.5	625.5	21	10.82	11.499
	Lipid_0250	PE_38:4	PE	Positive	768.6	627.5	21	11.315	12.046
	Lipid_0253	PE_38:3	PE	Positive	770.6	629.6	21	11.872	12.551
	Lipid_0257	PE_38:2	PE	Positive	772.6	631.6	21	12.777	13.527
	Lipid_0263	PE_P-18:1_22:6	PE	Positive	774.5	390.3	34	10.735	11.987
	Lipid_0265	PE_O-40:8	PE	Positive	774.5	633.5	21	10.934	11.649
	Lipid_0273	PE_P-18:1_22:5	PE	Positive	776.5	390.3	34	11.082	12.016
	Lipid_0274	PE_P-18:0_22:6	PE	Positive	776.5	392.3	34	11.747	12.264
	Lipid_0275	PE_O-40:7	PE	Positive	776.5	635.5	21	11.082	12.297
	Lipid_0279	PE_P-18:1_22:4	PE	Positive	778.5	390.3	34	11.586	12.556
	Lipid_0280	PE_P-18:0_22:5	PE	Positive	778.5	392.3	34	11.686	12.744
	Lipid_0281	PE_O-40:6	PE	Positive	778.5	637.5	21	11.322	12.82
	Lipid_0305	PE_40:8	PE	Positive	788.5	647.5	21	9.864	10.602
	Lipid_0313	PE_40:7	PE	Positive	790.5	649.5	21	10.631	11.27
	Lipid_0324	PE_40:6	PE	Positive	792.6	651.5	21	11.357	11.953
	Lipid_0327	PE_40:5	PE	Positive	794.6	653.6	21	11.65	12.338
	Lipid_0330	PE_40:4	PE	Positive	796.6	655.6	21	11.904	12.596
	Lipid_0091	PE_O-34:3_FA_16:0	PE	Negative	698.5	279.2	31	10.938	11.895
	Lipid_0102	PE_16:0_18:2_FA_16:0	PE	Negative	714.5	255.2	35	10.631	11.511
	Lipid_0103	PE_16:0_18:2_FA_18:2	PE	Negative	714.5	279.2	33	10.65	11.282
	Lipid_0116	PE_O-36:6_FA_20:5	PE	Negative	720.5	301.2	31	10.503	11.282
	Lipid_0118	PE_O-36:5_FA_20:5	PE	Negative	722.5	301.2	31	10.597	11.479
	Lipid_0119	PE_O-36:5_FA_20:4	PE	Negative	722.5	303.2	31	11.052	11.751
	Lipid_0122	PE_O-36:4_FA_18:2	PE	Negative	724.5	279.2	31	11.231	11.92
	Lipid_0123	PE_O-36:4_FA_20:4	PE	Negative	724.5	303.2	31	11.209	11.754
	Lipid_0127	PE_O-36:3_FA_18:2	PE	Negative	726.5	279.2	31	11.931	12.717
	Lipid_0128	PE_O-36:3_FA_18:1	PE	Negative	726.5	281.2	31	11.816	12.564
	Lipid_0134	PE_O-36:2_FA_18:2	PE	Negative	728.5	279.2	36	11.9	13.249
	Lipid_0135	PE_O-36:2_FA_18:1	PE	Negative	728.5	281.2	36	12.433	13.328
	Lipid_0151	PE_16:0_20:5_FA_16:0	PE	Negative	736.5	255.2	31	10.161	10.904
	Lipid_0152	PE_16:0_20:5_FA_20:5	PE	Negative	736.5	301.2	31	10.161	10.904
	Lipid_0154	PE_16:0_20:4_FA_16:0	PE	Negative	738.5	255.2	31	10.581	11.266
	Lipid_0155	PE_18:2_18:2_FA_18:2	PE	Negative	738.5	279.2	31	10.288	10.963
	Lipid_0156	PE_16:0_20:4_FA_20:4	PE	Negative	738.5	303.2	31	10.581	11.266
	Lipid_0158	PE_16:0_20:3_FA_16:0	PE	Negative	740.5	255.2	31	10.936	11.529
	Lipid_0159	PE_18:1_18:2_FA_18:1	PE	Negative	740.5	281.2	31	10.657	11.641
	Lipid_0160	PE_16:0_20:3_FA_20:3	PE	Negative	740.5	305.2	31	10.935	11.528
	Lipid_0165	PE_18:1_18:1_FA_18:1	PE	Negative	742.5	281.2	31	11.434	11.987
	Lipid_0166	PE_18:0_18:2_FA_18:0	PE	Negative	742.5	283.3	31	11.481	12.074
	Lipid_0171	PE_18:0_18:1_FA_18:1	PE	Negative	744.6	281.2	33	12.052	12.575
	Lipid_0172	PE_18:0_18:1_FA_18:0	PE	Negative	744.6	283.3	31	12.052	12.575
	Lipid_0174	PE_O-38:7_FA_20:5	PE	Negative	746.5	301.2	31	10.67	11.428
	Lipid_0175	PE_O-38:7_FA_22:6	PE	Negative	746.5	327.2	31	10.814	11.415
	Lipid_0180	PE_18:0_18:0_FA_18:0	PE	Negative	746.6	283.3	31	12.427	13.017
	Lipid_0182	PE_O-38:6_FA_20:5	PE	Negative	748.5	301.2	31	11.269	12.187
	Lipid_0183	PE_O-38:6_FA_20:4	PE	Negative	748.5	303.2	31	11.144	11.89
	Lipid_0184	PE_O-38:6_FA_22:6	PE	Negative	748.5	327.2	31	10.91	11.645
	Lipid_0185	PE_O-38:6_FA_22:5	PE	Negative	748.5	329.2	31	10.823	12.178
	Lipid_0192	PE_O-38:5_FA_20:5	PE	Negative	750.5	301.2	31	11.429	12.431
	Lipid_0193	PE_O-38:5_FA_20:4	PE	Negative	750.5	303.2	31	11.924	12.594
	Lipid_0194	PE_O-38:5_FA_20:3	PE	Negative	750.5	305.2	31	11.544	12.139
	Lipid_0195	PE_O-38:5_FA_22:5	PE	Negative	750.5	329.2	31	11.085	12.126
	Lipid_0200	PE_O-38:4_FA_20:4	PE	Negative	752.5	303.2	31	11.869	12.602
	Lipid_0201	PE_O-38:4_FA_20:3	PE	Negative	752.5	305.2	31	12.281	12.878
	Lipid_0224	PE_16:0_22:6_FA_16:0	PE	Negative	762.5	255.2	31	10.438	11.334
	Lipid_0225	PE_16:0_22:6_FA_18:2	PE	Negative	762.5	279.2	31	10.233	10.896
	Lipid_0226	PE_16:0_22:6_FA_22:6	PE	Negative	762.5	327.2	37	10.565	11.255
	Lipid_0231	PE_16:0_22:5_FA_16:0	PE	Negative	764.5	255.2	31	10.542	11.532
	Lipid_0232	PE_18:1_20:4_FA_18:1	PE	Negative	764.5	281.2	31	10.647	11.516
	Lipid_0233	PE_18:0_20:5_FA_18:0	PE	Negative	764.5	283.3	31	10.578	11.746
	Lipid_0235	PE_18:0_20:5_FA_20:5	PE	Negative	764.5	301.2	31	10.578	11.745
	Lipid_0236	PE_18:1_20:4_FA_20:4	PE	Negative	764.5	303.2	31	10.647	11.516
	Lipid_0237	PE_16:0_22:5_FA_22:5	PE	Negative	764.5	329.2	31	10.542	11.532
	Lipid_0241	PE_16:0_22:4_FA_16:0	PE	Negative	766.5	255.2	31	11.247	11.516
	Lipid_0242	PE_18:0_20:4_FA_18:0	PE	Negative	766.5	283.3	31	11.354	12.041
	Lipid_0243	PE_18:0_20:4_FA_20:4	PE	Negative	766.5	303.2	31	11.354	12.041
	Lipid_0244	PE_16:0_22:4_FA_22:4	PE	Negative	766.5	331.3	29	11.259	11.62
	Lipid_0249	PE_18:0_20:3_FA_18:0	PE	Negative	768.6	283.3	31	11.775	12.394
	Lipid_0254	PE_O-40:8_FA_22:6	PE	Negative	772.5	327.2	31	10.588	12.001
	Lipid_0261	PE_O-40:7_FA_22:6	PE	Negative	774.5	327.2	31	11.528	12.512
	Lipid_0262	PE_O-40:7_FA_22:5	PE	Negative	774.5	329.2	31	11.107	12.132
	Lipid_0272	PE_O-40:6_FA_22:5	PE	Negative	776.5	329.2	31	11.916	12.884
	Lipid_0304	PE_18:1_22:6_FA_18:1	PE	Negative	788.5	281.2	37	10.605	11.154
	Lipid_0319	PE_18:0_22:6_FA_18:0	PE	Negative	790.6	283.3	37	11.221	11.831
	Lipid_0322	PE_18:0_22:5_FA_18:0	PE	Negative	792.6	283.3	37	11.502	12.286
	Lipid_0323	PE_18:0_22:5_FA_22:5	PE	Negative	792.6	329.2	31	11.502	12.286
	Lipid_0448	PI_36:4	PI	Negative	857.5	241	43	9.167	9.703
	Lipid_0449	PI_16:0_20:4_FA_16:0	PI	Negative	857.5	255.2	49	9.146	9.733
	Lipid_0457	PI_36:2	PI	Negative	861.5	241	43	9.715	10.54
	Lipid_0458	PI_18:1_18:1_FA_18:1	PI	Negative	861.5	281.2	45	9.752	10.445
	Lipid_0459	PI_18:0_18:2_FA_18:2	PI	Negative	861.5	283.3	53	9.883	10.63
	Lipid_0461	PI_36:1	PI	Negative	863.5	241	43	10.368	10.912
	Lipid_0473	PI_38:4	PI	Negative	885.5	241	43	9.802	10.556
	Lipid_0474	PI_18:0_20:4_FA_20:4	PI	Negative	885.5	303.2	45	9.763	10.44
	Lipid_0475	PI_38:3	PI	Negative	887.6	241	43	10.198	10.765
	Lipid_0476	PI_18:0_20:3_FA_18:0	PI	Negative	887.6	283.3	53	10.238	10.907
	Lipid_0477	PI_18:0_20:3_FA_20:3	PI	Negative	887.6	305.2	41	10.16	11.008
	Lipid_0478	PI_40:6	PI	Negative	909.5	241	43	9.782	10.341
	Lipid_0479	PI_18:0_22:6_FA_22:6	PI	Negative	909.5	283.3	53	9.765	10.323
	Lipid_0074	SM_30:1;O2	SM	Positive	647.5	184.1	26	8.329	8.907
	Lipid_0082	SM_32:2;O2	SM	Positive	673.5	184.1	15	8.479	9.196
	Lipid_0083	SM_32:1;O2	SM	Positive	675.5	184.1	8	9.184	9.812
	Lipid_0085	SM_32:0;O2	SM	Positive	677.5	184.1	15	9.611	10.129
	Lipid_0087	SM_33:1;O2	SM	Positive	689.7	184.1	15	9.417	10.173
	Lipid_0092	SM_34:3;O2	SM	Positive	699.6	184.1	35	8.591	9.862
	Lipid_0094	SM_34:2;O2	SM	Positive	701.6	184.1	8	9.383	10.107
	Lipid_0095	SM_34:1;O2	SM	Positive	703.6	184.1	8	9.917	10.783
	Lipid_0098	SM_34:0;O2	SM	Positive	705.6	184.1	15	10.422	10.811
	Lipid_0106	SM_35:2;O2	SM	Positive	715.6	184.1	15	9.721	10.535
	Lipid_0109	SM_35:1;O2	SM	Positive	717.6	184.1	15	10.134	11.13
	Lipid_0113	SM_35:0;O2	SM	Positive	719.6	184.1	15	8.562	10.45
	Lipid_0126	SM_36:4;O2	SM	Positive	725.6	184.1	35	8.888	10.441
	Lipid_0131	SM_36:3;O2	SM	Positive	727.6	184.1	35	9.502	10.35
	Lipid_0139	SM_36:2;O2	SM	Positive	729.6	184.1	8	10.181	10.769
	Lipid_0145	SM_36:1;O2	SM	Positive	731.6	184.1	10	10.809	11.321
	Lipid_0149	SM_36:0;O2	SM	Positive	733.6	184.1	15	11.279	11.728
	Lipid_0211	SM_38:3;O2	SM	Positive	755.6	184.1	35	10.328	10.908
	Lipid_0215	SM_38:2;O2	SM	Positive	757.6	184.1	15	10.489	11.764
	Lipid_0218	SM_38:1;O2	SM	Positive	759.6	184.1	8	11.6	12.342
	Lipid_0223	SM_38:0;O2	SM	Positive	761.6	184.1	15	12.186	12.627
	Lipid_0258	SM_39:1;O2	SM	Positive	773.7	184.1	15	12.21	12.737
	Lipid_0287	SM_40:3;O2	SM	Positive	783.6	184.1	35	11.056	12.211
	Lipid_0291	SM_40:2;O2	SM	Positive	785.6	184.1	8	11.674	12.501
	Lipid_0296	SM_40:1;O2	SM	Positive	787.7	184.1	8	12.478	13.373
	Lipid_0312	SM_40:0;O2	SM	Positive	789.7	184.1	15	13.031	13.483
	Lipid_0335	SM_41:2;O2	SM	Positive	799.6	184.1	15	12.153	13.122
	Lipid_0341	SM_41:1;O2	SM	Positive	801.7	184.1	15	12.907	13.754
	Lipid_0368	SM_42:3;O2	SM	Positive	811.6	184.1	15	11.784	12.662
	Lipid_0371	SM_42:2;O2	SM	Positive	813.6	184.1	8	12.542	13.442
	Lipid_0374	SM_42:1;O2	SM	Positive	815.6	184.1	8	13.416	14.196
	Lipid_0383	SM_42:0;O2	SM	Positive	817.6	184.1	15	13.905	14.296
	Lipid_0420	SM_44:3;O2	SM	Positive	839.7	184.1	15	12.719	13.592
	Lipid_0422	SM_44:2;O2	SM	Positive	841.7	184.1	35	13.201	14.379
	Lipid_0423	SM_44:1;O2	SM	Positive	843.7	184.1	35	14.335	15.055

## Sheet: TableS3
Table S3: MRM transitions for TG measurements
	Lipid ID	Lipid Name	Lipid class	Polarity	Q1 (m/z)	Q3 (m/z)	CE	TGC	TGFA	Integration Start Time	Integration End Time
	TGID_010	TG_46:1-FA_18:1	TG	Positive	794.7	495.45	28	TG_46:1	FA_18:1	3.354	4.239
	TGID_018	TG_48:3-FA_18:1	TG	Positive	818.7	519.45	28	TG_48:3	FA_18:1	2.898	3.659
	TGID_019	TG_48:3-FA_18:2	TG	Positive	818.7	521.45	28	TG_48:3	FA_18:2	2.883	3.723
	TGID_022	TG_48:3-FA_16:1	TG	Positive	818.7	547.45	28	TG_48:3	FA_16:1	2.885	3.738
	TGID_026	TG_48:2-FA_18:1	TG	Positive	820.75	521.45	28	TG_48:2	FA_18:1	3.36	4.309
	TGID_027	TG_48:2-FA_16:0	TG	Positive	820.75	547.45	28	TG_48:2	FA_16:0	3.405	4.421
	TGID_028	TG_48:2-FA_16:1	TG	Positive	820.75	549.5	28	TG_48:2	FA_16:1	3.326	4.318
	TGID_029	TG_48:2-FA_14:0	TG	Positive	820.75	575.5	28	TG_48:2	FA_14:0	3.352	4.396
	TGID_032	TG_48:2-FA_18:2	TG	Positive	820.8	523.5	28	TG_48:2	FA_18:2	3.384	4.46
	TGID_034	TG_48:1-FA_18:1	TG	Positive	822.8	523.5	28	TG_48:1	FA_18:1	4.03	5.025
	TGID_035	TG_48:1-FA_16:0	TG	Positive	822.8	549.5	28	TG_48:1	FA_16:0	4.008	5.079
	TGID_036	TG_48:1-FA_16:1	TG	Positive	822.8	551.5	28	TG_48:1	FA_16:1	3.971	5.082
	TGID_037	TG_48:1-FA_14:0	TG	Positive	822.8	577.5	28	TG_48:1	FA_14:0	4.104	4.867
	TGID_040	TG_48:0-FA_16:0	TG	Positive	824.8	551.5	28	TG_48:0	FA_16:0	4.722	5.598
	TGID_045	TG_49:1-FA_18:1	TG	Positive	836.8	537.5	28	TG_49:1	FA_18:1	4.3	5.358
	TGID_047	TG_49:1-FA_16:0	TG	Positive	836.8	563.5	28	TG_49:1	FA_16:0	4.336	5.402
	TGID_048	TG_49:1-FA_15:0	TG	Positive	836.8	577.5	28	TG_49:1	FA_15:0	4.336	5.331
	TGID_059	TG_50:4-FA_18:2	TG	Positive	844.8	547.5	28	TG_50:4	FA_18:2	2.907	3.918
	TGID_060	TG_50:4-FA_18:3	TG	Positive	844.8	549.5	28	TG_50:4	FA_18:3	2.969	4.034
	TGID_061	TG_50:4-FA_16:0	TG	Positive	844.8	571.5	28	TG_50:4	FA_16:0	3.04	4.177
	TGID_062	TG_50:4-FA_16:1	TG	Positive	844.8	573.5	28	TG_50:4	FA_16:1	2.808	4.026
	TGID_063	TG_50:4-FA_14:0	TG	Positive	844.8	599.5	28	TG_50:4	FA_14:0	2.844	4.114
	TGID_065	TG_50:3-FA_18:1	TG	Positive	846.8	547.5	28	TG_50:3	FA_18:1	3.372	4.407
	TGID_066	TG_50:3-FA_18:2	TG	Positive	846.8	549.5	28	TG_50:3	FA_18:2	3.478	4.501
	TGID_067	TG_50:3-FA_18:3	TG	Positive	846.8	551.5	28	TG_50:3	FA_18:3	3.647	4.638
	TGID_068	TG_50:3-FA_16:0	TG	Positive	846.8	573.5	28	TG_50:3	FA_16:0	3.436	4.596
	TGID_069	TG_50:3-FA_16:1	TG	Positive	846.8	575.5	28	TG_50:3	FA_16:1	3.36	4.427
	TGID_070	TG_50:3-FA_14:0	TG	Positive	846.8	601.5	28	TG_50:3	FA_14:0	3.473	4.37
	TGID_071	TG_50:2-FA_18:1	TG	Positive	848.8	549.5	28	TG_50:2	FA_18:1	4.048	5.098
	TGID_072	TG_50:2-FA_18:2	TG	Positive	848.8	551.5	28	TG_50:2	FA_18:2	4.176	5.193
	TGID_073	TG_50:2-FA_16:0	TG	Positive	848.8	575.5	28	TG_50:2	FA_16:0	4.027	5.046
	TGID_074	TG_50:2-FA_16:1	TG	Positive	848.8	577.5	28	TG_50:2	FA_16:1	4.058	5.14
	TGID_075	TG_50:1-FA_18:0	TG	Positive	850.8	549.5	28	TG_50:1	FA_18:0	4.756	5.752
	TGID_076	TG_50:1-FA_18:1	TG	Positive	850.8	551.5	28	TG_50:1	FA_18:1	4.745	5.9
	TGID_077	TG_50:1-FA_16:0	TG	Positive	850.8	577.5	28	TG_50:1	FA_16:0	4.766	5.689
	TGID_079	TG_50:0-FA_18:0	TG	Positive	852.8	551.5	28	TG_50:0	FA_18:0	5.568	6.578
	TGID_080	TG_50:0-FA_16:0	TG	Positive	852.8	579.5	28	TG_50:0	FA_16:0	5.568	6.6
	TGID_081	TG_51:3-FA_18:2	TG	Positive	860.8	563.5	28	TG_51:3	FA_18:2	3.756	4.674
	TGID_082	TG_51:3-FA_17:1	TG	Positive	860.8	575.5	28	TG_51:3	FA_17:1	3.81	4.977
	TGID_083	TG_51:3-FA_16:0	TG	Positive	860.8	587.5	28	TG_51:3	FA_16:0	3.881	4.932
	TGID_084	TG_51:2-FA_18:1	TG	Positive	862.8	563.5	28	TG_51:2	FA_18:1	4.405	5.538
	TGID_085	TG_51:2-FA_17:1	TG	Positive	862.8	577.5	28	TG_51:2	FA_17:1	4.389	5.277
	TGID_086	TG_51:2-FA_16:0	TG	Positive	862.8	589.5	28	TG_51:2	FA_16:0	4.469	5.268
	TGID_087	TG_51:1-FA_18:1	TG	Positive	864.8	565.5	28	TG_51:1	FA_18:1	5.116	5.978
	TGID_088	TG_51:1-FA_17:0	TG	Positive	864.8	577.5	28	TG_51:1	FA_17:0	5.072	6.092
	TGID_089	TG_51:1-FA_16:0	TG	Positive	864.8	591.5	28	TG_51:1	FA_16:0	5.116	6.005
	TGID_091	TG_52:5-FA_18:2	TG	Positive	870.8	573.5	28	TG_52:5	FA_18:2	2.977	4.03
	TGID_092	TG_52:5-FA_18:3	TG	Positive	870.8	575.5	28	TG_52:5	FA_18:3	3.026	4.03
	TGID_093	TG_52:5-FA_16:0	TG	Positive	870.8	597.5	28	TG_52:5	FA_16:0	3.135	4.381
	TGID_094	TG_52:5-FA_16:1	TG	Positive	870.8	599.5	28	TG_52:5	FA_16:1	2.935	3.991
	TGID_095	TG_52:4-FA_20:4	TG	Positive	872.8	551.5	28	TG_52:4	FA_20:4	3.864	4.988
	TGID_096	TG_52:4-FA_18:1	TG	Positive	872.8	573.5	28	TG_52:4	FA_18:1	3.475	4.596
	TGID_097	TG_52:4-FA_18:2	TG	Positive	872.8	575.5	28	TG_52:4	FA_18:2	3.451	4.497
	TGID_098	TG_52:4-FA_18:3	TG	Positive	872.8	577.5	28	TG_52:4	FA_18:3	3.685	4.694
	TGID_099	TG_52:4-FA_16:0	TG	Positive	872.8	599.5	28	TG_52:4	FA_16:0	3.463	4.768
	TGID_100	TG_52:4-FA_16:1	TG	Positive	872.8	601.5	28	TG_52:4	FA_16:1	3.512	4.486
	TGID_102	TG_52:3-FA_18:0	TG	Positive	874.8	573.5	28	TG_52:3	FA_18:0	4.278	5.385
	TGID_103	TG_52:3-FA_18:1	TG	Positive	874.8	575.5	28	TG_52:3	FA_18:1	4.069	5.044
	TGID_104	TG_52:3-FA_18:2	TG	Positive	874.8	577.5	28	TG_52:3	FA_18:2	4.165	5.266
	TGID_106	TG_52:3-FA_16:0	TG	Positive	874.8	601.5	28	TG_52:3	FA_16:0	4.144	5.234
	TGID_107	TG_52:3-FA_16:1	TG	Positive	874.8	603.55	28	TG_52:3	FA_16:1	2.923	6.377
	TGID_109	TG_52:2-FA_18:0	TG	Positive	876.8	575.5	28	TG_52:2	FA_18:0	4.896	5.891
	TGID_110	TG_52:2-FA_18:1	TG	Positive	876.8	577.5	28	TG_52:2	FA_18:1	4.758	5.791
	TGID_111	TG_52:2-FA_18:2	TG	Positive	876.8	579.5	28	TG_52:2	FA_18:2	4.906	5.839
	TGID_112	TG_52:2-FA_16:0	TG	Positive	876.8	603.5	28	TG_52:2	FA_16:0	4.758	5.88
	TGID_113	TG_52:2-FA_16:1	TG	Positive	876.8	605.6	28	TG_52:2	FA_16:1	4.948	5.851
	TGID_115	TG_52:1-FA_18:0	TG	Positive	878.8	577.5	28	TG_52:1	FA_18:0	5.518	6.623
	TGID_116	TG_52:1-FA_18:1	TG	Positive	878.8	579.5	28	TG_52:1	FA_18:1	5.625	6.497
	TGID_117	TG_52:1-FA_16:0	TG	Positive	878.8	605.5	28	TG_52:1	FA_16:0	5.593	6.591
	TGID_120	TG_53:4-FA_18:1	TG	Positive	886.8	587.5	28	TG_53:4	FA_18:1	3.871	4.832
	TGID_121	TG_53:4-FA_18:2	TG	Positive	886.8	589.5	28	TG_53:4	FA_18:2	3.737	4.984
	TGID_123	TG_53:4-FA_17:1	TG	Positive	886.8	601.5	28	TG_53:4	FA_17:1	3.844	4.877
	TGID_124	TG_53:3-FA_18:1	TG	Positive	888.8	589.5	28	TG_53:3	FA_18:1	4.481	5.555
	TGID_125	TG_53:3-FA_18:2	TG	Positive	888.8	591.5	28	TG_53:3	FA_18:2	4.49	5.484
	TGID_126	TG_53:3-FA_17:0	TG	Positive	888.8	601.5	28	TG_53:3	FA_17:0	4.446	5.431
	TGID_127	TG_53:3-FA_17:1	TG	Positive	888.8	603.5	28	TG_53:3	FA_17:1	4.411	5.546
	TGID_131	TG_53:2-FA_18:1	TG	Positive	890.8	591.5	28	TG_53:2	FA_18:1	4.974	6.157
	TGID_133	TG_53:2-FA_17:0	TG	Positive	890.8	603.5	28	TG_53:2	FA_17:0	5.103	6.069
	TGID_139	TG_54:7-FA_18:2	TG	Positive	894.8	597.5	28	TG_54:7	FA_18:2	2.523	3.787
	TGID_144	TG_54:6-FA_22:6	TG	Positive	896.8	551.5	28	TG_54:6	FA_22:6	3.847	4.6
	TGID_145	TG_54:6-FA_20:4	TG	Positive	896.8	575.5	28	TG_54:6	FA_20:4	3.401	4.262
	TGID_146	TG_54:6-FA_20:5	TG	Positive	896.8	577.5	28	TG_54:6	FA_20:5	3.557	4.62
	TGID_147	TG_54:6-FA_18:1	TG	Positive	896.8	597.5	28	TG_54:6	FA_18:1	3.12	4.487
	TGID_148	TG_54:6-FA_18:2	TG	Positive	896.8	599.5	28	TG_54:6	FA_18:2	3.063	4.251
	TGID_149	TG_54:6-FA_18:3	TG	Positive	896.8	601.5	28	TG_54:6	FA_18:3	3.088	4.238
	TGID_150	TG_54:6-FA_16:0	TG	Positive	896.8	623.5	28	TG_54:6	FA_16:0	3.256	4.775
	TGID_153	TG_54:5-FA_20:3	TG	Positive	898.8	575.5	28	TG_54:5	FA_20:3	2.337	5.704
	TGID_154	TG_54:5-FA_20:4	TG	Positive	898.8	577.5	28	TG_54:5	FA_20:4	3.913	4.797
	TGID_156	TG_54:5-FA_18:1	TG	Positive	898.8	599.5	28	TG_54:5	FA_18:1	3.522	4.893
	TGID_157	TG_54:5-FA_18:2	TG	Positive	898.8	601.5	28	TG_54:5	FA_18:2	3.584	4.712
	TGID_158	TG_54:5-FA_18:3	TG	Positive	898.8	603.55	28	TG_54:5	FA_18:3	2.337	5.704
	TGID_159	TG_54:5-FA_16:0	TG	Positive	898.8	625.5	28	TG_54:5	FA_16:0	3.663	5.055
	TGID_163	TG_54:4-FA_18:0	TG	Positive	900.8	599.5	28	TG_54:4	FA_18:0	4.305	5.412
	TGID_164	TG_54:4-FA_18:1	TG	Positive	900.8	601.5	28	TG_54:4	FA_18:1	4.135	5.216
	TGID_165	TG_54:4-FA_18:2	TG	Positive	900.8	603.5	28	TG_54:4	FA_18:2	4.159	5.314
	TGID_166	TG_54:4-FA_18:3	TG	Positive	900.8	605.6	28	TG_54:4	FA_18:3	4.326	5.308
	TGID_167	TG_54:4-FA_16:0	TG	Positive	900.8	627.5	28	TG_54:4	FA_16:0	4.327	5.611
	TGID_169	TG_54:3-FA_20:1	TG	Positive	902.8	575.5	28	TG_54:3	FA_20:1	3.435	7.188
	TGID_170	TG_54:3-FA_20:2	TG	Positive	902.8	577.5	28	TG_54:3	FA_20:2	3.435	7.188
	TGID_172	TG_54:3-FA_18:0	TG	Positive	902.8	601.5	28	TG_54:3	FA_18:0	4.975	5.97
	TGID_173	TG_54:3-FA_18:1	TG	Positive	902.8	603.5	28	TG_54:3	FA_18:1	4.806	5.855
	TGID_174	TG_54:3-FA_18:2	TG	Positive	902.8	605.6	28	TG_54:3	FA_18:2	4.901	5.844
	TGID_175	TG_54:3-FA_16:0	TG	Positive	902.8	629.55	28	TG_54:3	FA_16:0	3.435	7.188
	TGID_177	TG_54:2-FA_20:1	TG	Positive	904.8	577.6	28	TG_54:2	FA_20:1	5.476	6.319
	TGID_178	TG_54:2-FA_18:0	TG	Positive	904.8	603.5	28	TG_54:2	FA_18:0	5.562	6.643
	TGID_179	TG_54:2-FA_18:1	TG	Positive	904.8	605.5	28	TG_54:2	FA_18:1	5.456	6.622
	TGID_180	TG_54:2-FA_16:0	TG	Positive	904.8	631.6	28	TG_54:2	FA_16:0	5.509	6.434
	TGID_182	TG_54:1-FA_18:0	TG	Positive	906.8	605.5	28	TG_54:1	FA_18:0	6.306	7.104
	TGID_183	TG_54:1-FA_18:1	TG	Positive	906.8	607.5	28	TG_54:1	FA_18:1	6.263	7.135
	TGID_196	TG_56:8-FA_22:6	TG	Positive	920.8	575.5	28	TG_56:8	FA_22:6	3.212	4.119
	TGID_200	TG_56:7-FA_22:5	TG	Positive	922.8	575.5	28	TG_56:7	FA_22:5	3.276	4.619
	TGID_201	TG_56:7-FA_22:6	TG	Positive	922.8	577.5	28	TG_56:7	FA_22:6	3.777	4.706
	TGID_203	TG_56:7-FA_20:4	TG	Positive	922.8	601.5	28	TG_56:7	FA_20:4	3.455	4.364
	TGID_204	TG_56:7-FA_20:5	TG	Positive	922.8	603.5	28	TG_56:7	FA_20:5	3.474	4.639
	TGID_205	TG_56:7-FA_18:1	TG	Positive	922.8	623.5	28	TG_56:7	FA_18:1	3.494	4.697
	TGID_206	TG_56:7-FA_18:2	TG	Positive	922.8	625.5	28	TG_56:7	FA_18:2	3.257	4.404
	TGID_208	TG_56:7-FA_16:0	TG	Positive	922.8	649.5	28	TG_56:7	FA_16:0	3.494	4.658
	TGID_210	TG_56:6-FA_22:5	TG	Positive	924.8	577.5	28	TG_56:6	FA_22:5	4.103	5.115
	TGID_212	TG_56:6-FA_20:4	TG	Positive	924.8	603.5	28	TG_56:6	FA_20:4	4.048	4.959
	TGID_215	TG_56:6-FA_18:1	TG	Positive	924.8	625.5	28	TG_56:6	FA_18:1	3.946	5.087
	TGID_218	TG_56:6-FA_16:0	TG	Positive	924.8	651.5	28	TG_56:6	FA_16:0	3.955	5.271
	TGID_223	TG_56:5-FA_20:4	TG	Positive	926.8	605.6	28	TG_56:5	FA_20:4	4.754	5.633
	TGID_225	TG_56:5-FA_18:0	TG	Positive	926.8	625.5	28	TG_56:5	FA_18:0	4.533	5.696
	TGID_226	TG_56:5-FA_18:1	TG	Positive	926.8	627.5	28	TG_56:5	FA_18:1	4.276	5.633
	TGID_233	TG_56:4-FA_18:1	TG	Positive	928.8	629.6	28	TG_56:4	FA_18:1	4.937	5.848
	TGID_235	TG_56:3-FA_20:1	TG	Positive	930.8	603.6	28	TG_56:3	FA_20:1	5.49	6.487
	TGID_238	TG_56:3-FA_18:1	TG	Positive	930.8	631.6	28	TG_56:3	FA_18:1	5.449	6.511
	TGID_244	TG_56:2-FA_18:1	TG	Positive	932.8	633.6	28	TG_56:2	FA_18:1	6.199	7.078
	TGID_254	TG_58:9-FA_22:6	TG	Positive	946.8	601.5	28	TG_58:9	FA_22:6	3.231	4.01
	TGID_262	TG_58:8-FA_22:6	TG	Positive	948.8	603.55	28	TG_58:8	FA_22:6	3.278	5.217
	TGID_264	TG_58:8-FA_18:1	TG	Positive	948.8	649.5	28	TG_58:8	FA_18:1	3.54	4.911
	TGID_266	TG_58:7-FA_22:5	TG	Positive	950.8	603.55	28	TG_58:7	FA_22:5	3.66	5.615

## Sheet: TableS4
Table S4: Protein-to-protein correlations
	Correlation	Pearson's r (Cohort 1)	Pearson's r (Cohort 2)	Pearson's r (Cohort 3)	Pearson's p (Cohort 1)	Pearson's p (Cohort 2)	Pearson's p (Cohort 3)
	CCL20 - CASP-8	0.255776	0.313988	0.230852	0.016162	1.2757e-05	0.00020621
	CTSD - CCL20	0.456182	0.504225	0.446856	7.94e-06	2.1805e-13	7.1498e-14
	MMP-3 - SCF	0.371791	0.205998	0.311949	0.00036165	0.0047902	3.8888e-07
	MMP-3 - TRAIL	0.397556	0.414373	0.376348	0.00012535	4.1111e-09	5.7268e-10
	MMP-3 - TWEAK	0.50731	0.374083	0.45915	4.55e-07	1.4433e-07	1.199e-14
	SCF - TWEAK	0.578763	0.48195	0.618743	3.5e-09	3.2918e-12	0
	TRAIL - SCF	0.310872	0.49675	0.569648	0.0031989	5.5422e-13	0
	TWEAK - TRAIL	0.58402	0.658109	0.725476	2.33e-09	0	0
	Correlations between proteins that are significantly variable across the three cohorts (Figure1). Protein-protein correlation of pearson's r-values more than 0.2 absolute value and p-values less than 0.01 in Cohort 2 and Cohort 3 were listed.

## Sheet: TableS5_1
Table S5-1: Phospholipids with differential levels among clinical categories in Cohort 2
		Lipid Name	Lipid Class	FDR-adjusted p-value (BH)	Tukey's HSD
		LPC_16:0†	PC	0.014555	2_MASLD-1_HCV
		LPC_16:0_FA_16:0	PC	0.025489	2_MASLD-1_HCV
		LPC_16:1	PC	0.044336	3_MASH-1_HCV
		LPC_18:0†	PC	0.0022544	2_MASLD-1_HCV
		LPC_18:0_FA_18:0†	PC	0.025329	2_MASLD-1_HCV
		LPC_18:2*†	PC	0.038801	3_MASH-2_MASLD
		LPC_18:2_FA_18:2*#	PC	0.032236	3_MASH-2_MASLD
		LPC_19:0	PC	0.04743	3_MASH-1_HCV
		LPC_20:0*	PC	0.025529	3_MASH-2_MASLD
		LPC_20:3†	PC	0.0057619	2_MASLD-1_HCV
		LPC_20:4†	PC	0.0031022	2_MASLD-1_HCV
		LPC_22:0*	PC	0.0057619	3_MASH-1_HCV; 3_MASH-2_MASLD
		LPC_22:5†	PC	0.038801	2_MASLD-1_HCV
		LPC_22:6†	PC	0.012435	2_MASLD-1_HCV; 3_MASH-1_HCV
		LPC_24:0*#†	PC	0.0010797	3_MASH-1_HCV; 3_MASH-2_MASLD
		LPC_24:1	PC	0.011768	2_MASLD-1_HCV
		PC_15:0_18:2_FA_18:2†	PC	0.037933	3_MASH-1_HCV
		PC_15:0_22:6_FA_15:0	PC	0.012435	2_MASLD-1_HCV
		PC_16:0_20:1_FA_16:0†	PC	0.014555	2_MASLD-1_HCV
		PC_16:0_20:1_FA_20:1†	PC	0.043711	2_MASLD-1_HCV
		PC_16:0_20:2_FA_16:0†	PC	0.034077	2_MASLD-1_HCV
		PC_16:0_20:4_FA_16:0	PC	0.031506	2_MASLD-1_HCV
		PC_17:0_18:2_FA_18:2	PC	0.034743	3_MASH-1_HCV
		PC_18:0_18:1_FA_18:1	PC	0.044336	3_MASH-1_HCV
		PC_18:0_20:3_FA_18:0	PC	0.011204	2_MASLD-1_HCV; 3_MASH-1_HCV
		PC_18:0_20:3_FA_20:3	PC	0.0060033	2_MASLD-1_HCV; 3_MASH-1_HCV
		PC_18:0_20:4_FA_18:0	PC	0.012104	2_MASLD-1_HCV
		PC_18:0_20:4_FA_20:4	PC	0.025329	2_MASLD-1_HCV
		PC_18:1_18:2_FA_18:1*†	PC	0.038801	3_MASH-1_HCV; 3_MASH-2_MASLD
		PC_18:1_18:2_FA_18:2*†	PC	0.030816	3_MASH-1_HCV; 3_MASH-2_MASLD
		PC_18:1_20:1_FA_18:1†	PC	0.014555	2_MASLD-1_HCV
		PC_18:1_20:1_FA_20:1†	PC	0.00095513	2_MASLD-1_HCV
		PC_18:1_22:6_FA_18:1†	PC	0.04443	2_MASLD-1_HCV
		PC_18:2_20:0_FA_18:2*	PC	0.038034	3_MASH-1_HCV; 3_MASH-2_MASLD
		PC_18:2_20:0_FA_20:0	PC	0.049431	3_MASH-1_HCV
		PC_18:2_20:4_FA_18:2*#	PC	0.012435	2_MASLD-1_HCV; 3_MASH-2_MASLD
		PC_18:2_20:4_FA_20:4	PC	0.012435	2_MASLD-1_HCV
		PC_20:4_20:4_FA_20:4†	PC	0.047373	2_MASLD-1_HCV
		PC_31:0†	PC	0.0022544	2_MASLD-1_HCV
		PC_31:1*†	PC	0.034178	2_MASLD-1_HCV; 3_MASH-2_MASLD
		PC_32:0†	PC	0.0022544	2_MASLD-1_HCV
		PC_33:0†	PC	0.021995	2_MASLD-1_HCV
		PC_33:1*#†	PC	0.018931	2_MASLD-1_HCV; 3_MASH-2_MASLD
		PC_34:1	PC	0.024833	3_MASH-1_HCV
		PC_36:1*#†	PC	0.0010797	3_MASH-1_HCV; 3_MASH-2_MASLD
		PC_36:4	PC	0.015693	2_MASLD-1_HCV
		PC_37:2	PC	0.014555	2_MASLD-1_HCV; 3_MASH-1_HCV
		PC_38:3†	PC	0.0022544	2_MASLD-1_HCV; 3_MASH-1_HCV
		PC_38:4_peak2	PC	0.015364	2_MASLD-1_HCV
		PC_42:5*	PC	0.021152	2_MASLD-1_HCV; 3_MASH-2_MASLD
		PC_42:6	PC	0.03333	2_MASLD-1_HCV
		PC_42:7†	PC	0.0012858	2_MASLD-1_HCV
		PC_O-32:0†	PC	0.047398	2_MASLD-1_HCV
		PC_O-32:1†	PC	0.037035	2_MASLD-1_HCV; 3_MASH-1_HCV
		PC_O-32:2†	PC	0.014555	2_MASLD-1_HCV
		PC_O-34:1†	PC	0.021689	2_MASLD-1_HCV; 3_MASH-1_HCV
		PC_O-34:2_FA_18:1†	PC	0.014637	2_MASLD-1_HCV; 3_MASH-1_HCV
		PC_O-34:2_FA_18:2*#†	PC	0.0044077	3_MASH-1_HCV; 3_MASH-2_MASLD
		PC_O-34:2_peak1*#†	PC	0.0010797	3_MASH-1_HCV; 3_MASH-2_MASLD
		PC_O-34:2_peak2†	PC	0.014555	2_MASLD-1_HCV; 3_MASH-1_HCV
		PC_O-34:3*#†	PC	0.0022544	3_MASH-1_HCV; 3_MASH-2_MASLD
		PC_O-36:2*#†	PC	0.031428	3_MASH-1_HCV; 3_MASH-2_MASLD
		PC_O-36:2_FA_18:1_peak1†	PC	0.037933	2_MASLD-1_HCV; 3_MASH-1_HCV
		PC_O-36:2_FA_18:2*#†	PC	0.031506	3_MASH-1_HCV; 3_MASH-2_MASLD
		PC_O-36:3*#†	PC	0.0074363	3_MASH-1_HCV; 3_MASH-2_MASLD
		PC_O-36:5	PC	0.04443	3_MASH-1_HCV
		PC_O-38:5*#†	PC	0.023262	3_MASH-1_HCV; 3_MASH-2_MASLD
		PC_O-38:6	PC	0.011099	2_MASLD-1_HCV; 3_MASH-1_HCV
		PC_O-40:7†	PC	0.001533	2_MASLD-1_HCV; 3_MASH-1_HCV
		LPE_18:0†	PE	0.044336	2_MASLD-1_HCV
		LPE_20:4*#†	PE	0.04743	2_MASLD-1_HCV; 3_MASH-2_MASLD
		PE_16:0_22:6_FA_16:0*#†	PE	0.022334	3_MASH-1_HCV; 3_MASH-2_MASLD
		PE_18:0_20:3_FA_18:0	PE	0.024245	3_MASH-1_HCV
		PE_18:0_22:6_FA_18:0*#†	PE	0.00096573	3_MASH-1_HCV; 3_MASH-2_MASLD
		PE_32:0	PE	0.024879	2_MASLD-1_HCV
		PE_34:1*	PE	0.032236	3_MASH-1_HCV; 3_MASH-2_MASLD
		PE_36:5	PE	0.042078	2_MASLD-1_HCV
		PE_38:6*#†	PE	0.02232	2_MASLD-1_HCV; 3_MASH-2_MASLD
		PE_40:6*#†	PE	0.0030856	3_MASH-1_HCV; 3_MASH-2_MASLD
		PE_40:7*	PE	0.044336	3_MASH-2_MASLD
		PE_O-34:3_FA_16:0*	PE	0.025329	3_MASH-2_MASLD
		PE_O-36:2*	PE	0.035445	3_MASH-1_HCV; 3_MASH-2_MASLD
		PE_O-36:2_FA_18:2*	PE	0.012601	3_MASH-1_HCV; 3_MASH-2_MASLD
		PE_O-36:3*	PE	0.030816	3_MASH-2_MASLD
		PE_O-36:3_FA_18:2*	PE	0.030042	3_MASH-1_HCV; 3_MASH-2_MASLD
		PE_O-38:5_FA_22:5*#	PE	0.023422	3_MASH-2_MASLD
		PE_O-38:6_FA_20:4†	PE	0.030816	2_MASLD-1_HCV
		PE_O-38:6_FA_22:6*#†	PE	0.037635	3_MASH-2_MASLD
		PE_O-38:6_FA_22:5*	PE	0.00095513	2_MASLD-1_HCV; 3_MASH-2_MASLD
		PE_O-38:7_FA_22:6†	PE	0.043711	2_MASLD-1_HCV
		PE_O-40:6_FA_22:5†	PE	0.0046566	2_MASLD-1_HCV; 3_MASH-2_MASLD
		PE_O-40:7_FA_22:5†	PE	0.014555	2_MASLD-1_HCV
		PE_P-16:0_22:5*#†	PE	0.0047834	2_MASLD-1_HCV; 3_MASH-2_MASLD
		PE_P-16:0_22:6*†	PE	0.030042	2_MASLD-1_HCV; 3_MASH-2_MASLD
		PE_P-18:0_22:5*#†	PE	0.014555	2_MASLD-1_HCV; 3_MASH-2_MASLD
		PE_P-18:1_18:2*	PE	0.030816	3_MASH-2_MASLD
		PE_P-18:1_20:4*	PE	0.038034	3_MASH-2_MASLD
		PE_P-18:1_22:4*#	PE	0.02415	2_MASLD-1_HCV; 3_MASH-2_MASLD
		PE_P-18:1_22:5*#†	PE	0.012435	2_MASLD-1_HCV; 3_MASH-2_MASLD
		PI_18:0_18:2_FA_18:2†	PI	2.03e-05	2_MASLD-1_HCV; 3_MASH-1_HCV
		PI_18:0_20:3_FA_18:0†	PI	0.00096573	2_MASLD-1_HCV; 3_MASH-1_HCV
		PI_18:0_20:3_FA_20:3†	PI	5.17e-05	2_MASLD-1_HCV; 3_MASH-1_HCV
		PI_18:0_20:4_FA_20:4†	PI	0.0011421	2_MASLD-1_HCV; 3_MASH-1_HCV
		PI_18:0_22:6_FA_22:6†	PI	0.0032496	2_MASLD-1_HCV
		PI_36:2†	PI	7.92e-05	2_MASLD-1_HCV; 3_MASH-1_HCV
		PI_38:3†	PI	0.00086087	2_MASLD-1_HCV; 3_MASH-1_HCV
		PI_38:4†	PI	0.0031022	2_MASLD-1_HCV
		PI_40:6†	PI	0.0024607	2_MASLD-1_HCV
		SM_32:0;O2†	SM	0.012435	2_MASLD-1_HCV
		SM_33:1;O2	SM	0.031506	2_MASLD-1_HCV
		SM_34:0;O2†	SM	0.00067988	2_MASLD-1_HCV; 3_MASH-1_HCV
		SM_34:1;O2†	SM	0.0062327	2_MASLD-1_HCV; 3_MASH-1_HCV
		SM_34:2;O2†	SM	0.031428	2_MASLD-1_HCV
		SM_34:3;O2†	SM	0.021869	2_MASLD-1_HCV; 3_MASH-1_HCV
		SM_35:2;O2†	SM	0.024833	2_MASLD-1_HCV; 3_MASH-1_HCV
		SM_36:0;O2*#†	SM	0.00095513	3_MASH-1_HCV; 3_MASH-2_MASLD
		SM_36:1;O2†	SM	1.5e-06	2_MASLD-1_HCV; 3_MASH-1_HCV
		SM_36:2;O2†	SM	1.13e-06	2_MASLD-1_HCV; 3_MASH-1_HCV
		SM_36:3;O2†	SM	0.000346	2_MASLD-1_HCV
		SM_36:4;O2†	SM	0.04443	2_MASLD-1_HCV
		SM_38:0;O2*#†	SM	0.000346	3_MASH-1_HCV; 3_MASH-2_MASLD
		SM_38:1;O2†	SM	1.91e-08	2_MASLD-1_HCV; 3_MASH-1_HCV
		SM_38:2;O2*#†	SM	7.85e-06	2_MASLD-1_HCV; 3_MASH-2_MASLD
		SM_40:0;O2*†	SM	0.00095513	3_MASH-1_HCV; 3_MASH-2_MASLD
		SM_40:1;O2†	SM	3.77e-07	2_MASLD-1_HCV; 3_MASH-1_HCV
		SM_40:2;O2†	SM	1.53e-09	2_MASLD-1_HCV; 3_MASH-1_HCV
		SM_40:3;O2†	SM	0.015364	2_MASLD-1_HCV; 3_MASH-1_HCV
		SM_41:1;O2	SM	0.020422	2_MASLD-1_HCV; 3_MASH-1_HCV
		SM_42:1;O2†	SM	0.000136	2_MASLD-1_HCV; 3_MASH-1_HCV
		SM_44:2;O2	SM	0.038863	2_MASLD-1_HCV
		SM_44:3;O2†	SM	0.0022544	2_MASLD-1_HCV; 3_MASH-1_HCV
		Phospholipids with an FDR-adjusted p-value of less than 0.05 for the one-way ANOVA test were listed.
		* indicates significant differences between MASLD and MASH within Cohort 2.
		# indicates significant differences between MASLD and MASH, reproduced in Cohort 2 and Cohort 3.
		† indicates significant differences between HCV and MASH or HCV and MASLD, reproduced in Cohort 2 and Cohort 3.

## Sheet: TableS5_2 
Table S5-2: Phospholipids with differential levels among clinical categories in Cohort 3
		Lipid Name	Lipid Class	FDR-adjusted p-value (BH)	Tukey's HSD
		LPC_16:0†	PC	0.0049298	2_MASLD-1_HCV; 3_MASH-1_HCV
		LPC_18:0†	PC	6.42e-05	2_MASLD-1_HCV; 3_MASH-1_HCV
		LPC_18:0_FA_18:0†	PC	0.019575	2_MASLD-1_HCV
		LPC_18:2*#	PC	0.020675	2_MASLD-1_HCV; 3_MASH-2_MASLD
		LPC_18:2_FA_18:2*#	PC	0.031171	3_MASH-2_MASLD
		LPC_20:3†	PC	0.0083745	2_MASLD-1_HCV; 3_MASH-1_HCV
		LPC_20:4†	PC	0.0031612	2_MASLD-1_HCV
		LPC_20:5	PC	0.039897	2_MASLD-1_HCV
		LPC_22:5†	PC	0.026611	2_MASLD-1_HCV
		LPC_22:6†	PC	0.011753	2_MASLD-1_HCV; 3_MASH-1_HCV
		LPC_24:0*#†	PC	0.03601	3_MASH-1_HCV; 3_MASH-2_MASLD
		PC_15:0_18:1_FA_15:0	PC	4.67e-05	2_MASLD-1_HCV; 3_MASH-1_HCV
		PC_15:0_18:1_FA_18:1	PC	0.0025685	2_MASLD-1_HCV
		PC_15:0_18:2_FA_15:0	PC	0.025853	3_MASH-1_HCV
		PC_15:0_18:2_FA_18:2†	PC	0.011753	2_MASLD-1_HCV; 3_MASH-1_HCV
		PC_15:0_22:6_FA_15:0*	PC	0.02928	3_MASH-2_MASLD
		PC_16:0_16:1_FA_16:0	PC	0.031998	2_MASLD-1_HCV
		PC_16:0_16:1_FA_16:1*	PC	0.04176	3_MASH-2_MASLD
		PC_16:0_17:1_FA_17:1*	PC	0.035993	2_MASLD-1_HCV; 3_MASH-2_MASLD
		PC_16:0_20:1_FA_16:0*†	PC	0.0046269	2_MASLD-1_HCV; 3_MASH-2_MASLD
		PC_16:0_20:1_FA_20:1*†	PC	0.010575	2_MASLD-1_HCV; 3_MASH-2_MASLD
		PC_16:0_20:2_FA_16:0†	PC	0.00023385	2_MASLD-1_HCV; 3_MASH-1_HCV
		PC_16:0_20:2_FA_20:2	PC	0.0019067	2_MASLD-1_HCV; 3_MASH-1_HCV
		PC_18:1_18:2_FA_18:1†	PC	0.048106	3_MASH-1_HCV
		PC_18:1_18:2_FA_18:2†	PC	0.036313	3_MASH-1_HCV
		PC_18:1_20:1_FA_18:1*v†	PC	0.0033519	2_MASLD-1_HCV; 3_MASH-2_MASLD
		PC_18:1_20:1_FA_20:1*†	PC	0.0046269	2_MASLD-1_HCV; 3_MASH-2_MASLD
		PC_18:1_20:2_FA_18:1	PC	0.00085354	2_MASLD-1_HCV
		PC_18:1_20:2_FA_20:2	PC	0.00029998	2_MASLD-1_HCV; 3_MASH-1_HCV
		PC_18:1_22:6_FA_18:1†	PC	0.024653	2_MASLD-1_HCV
		PC_18:1_22:6_FA_22:6	PC	0.012529	2_MASLD-1_HCV
		PC_18:2_20:4_FA_18:2*#	PC	0.033695	3_MASH-2_MASLD
		PC_20:4_20:4_FA_20:4†	PC	0.023424	2_MASLD-1_HCV
		PC_31:0†	PC	0.00053576	2_MASLD-1_HCV
		PC_31:1†	PC	0.013989	2_MASLD-1_HCV
		PC_32:0†	PC	0.00081998	2_MASLD-1_HCV
		PC_32:1*	PC	0.037928	3_MASH-2_MASLD
		PC_33:0†	PC	0.014666	2_MASLD-1_HCV
		PC_33:1*#†	PC	0.0031612	2_MASLD-1_HCV; 3_MASH-2_MASLD
		PC_33:2	PC	0.0043366	2_MASLD-1_HCV; 3_MASH-1_HCV
		PC_36:1*#†	PC	0.0025685	3_MASH-1_HCV; 3_MASH-2_MASLD
		PC_38:3†	PC	0.014666	2_MASLD-1_HCV; 3_MASH-1_HCV
		PC_38:7	PC	0.036313	2_MASLD-1_HCV
		PC_40:7	PC	0.022747	2_MASLD-1_HCV
		PC_42:4	PC	0.035386	2_MASLD-1_HCV
		PC_42:7†	PC	0.0049378	2_MASLD-1_HCV
		PC_O-32:0†	PC	0.016392	2_MASLD-1_HCV
		PC_O-32:0_FA_16:0	PC	0.0066206	2_MASLD-1_HCV
		PC_O-32:1†	PC	0.001552	2_MASLD-1_HCV; 3_MASH-1_HCV
		PC_O-32:2†	PC	0.0031612	2_MASLD-1_HCV; 3_MASH-1_HCV
		PC_O-34:1†	PC	0.0094807	2_MASLD-1_HCV; 3_MASH-1_HCV
		PC_O-34:2_FA_18:1†	PC	0.0031612	2_MASLD-1_HCV; 3_MASH-1_HCV
		PC_O-34:2_FA_18:2*#†	PC	0.0031612	3_MASH-1_HCV; 3_MASH-2_MASLD
		PC_O-34:2_peak1*#†	PC	0.0054667	3_MASH-1_HCV; 3_MASH-2_MASLD
		PC_O-34:2_peak2†	PC	0.0023372	2_MASLD-1_HCV; 3_MASH-1_HCV
		PC_O-34:3*#†	PC	0.00042048	3_MASH-1_HCV; 3_MASH-2_MASLD
		PC_O-36:2*#†	PC	0.018356	3_MASH-1_HCV; 3_MASH-2_MASLD
		PC_O-36:2_FA_18:1_peak1†	PC	0.0031612	2_MASLD-1_HCV; 3_MASH-1_HCV
		PC_O-36:2_FA_18:1_peak2	PC	0.0039686	2_MASLD-1_HCV; 3_MASH-1_HCV
		PC_O-36:2_FA_18:2*#†	PC	0.0052826	3_MASH-1_HCV; 3_MASH-2_MASLD
		PC_O-36:3*#†	PC	0.0033519	3_MASH-1_HCV; 3_MASH-2_MASLD
		PC_O-38:5*#†	PC	0.029651	3_MASH-1_HCV; 3_MASH-2_MASLD
		PC_O-38:6_FA_22:6	PC	0.02172	2_MASLD-1_HCV
		PC_O-40:7†	PC	0.0156	2_MASLD-1_HCV
		LPE_18:0†	PE	0.035386	2_MASLD-1_HCV
		LPE_18:3	PE	0.00086022	2_MASLD-1_HCV; 3_MASH-1_HCV
		LPE_20:3	PE	0.0033519	2_MASLD-1_HCV; 3_MASH-1_HCV
		LPE_20:4†*#†	PE	0.009615	2_MASLD-1_HCV; 3_MASH-2_MASLD
		PE_16:0_18:2_FA_16:0	PE	0.0083745	2_MASLD-1_HCV
		PE_16:0_18:2_FA_16:0	PE	0.049976	2_MASLD-1_HCV
		PE_16:0_20:3_FA_16:0*	PE	0.021364	3_MASH-2_MASLD
		PE_16:0_20:3_FA_20:3*	PE	0.010575	2_MASLD-1_HCV; 3_MASH-2_MASLD
		PE_16:0_20:4_FA_16:0	PE	0.02771	2_MASLD-1_HCV
		PE_16:0_20:4_FA_20:4	PE	0.0058913	2_MASLD-1_HCV
		PE_16:0_22:6_FA_16:0*#†	PE	0.018356	3_MASH-1_HCV; 3_MASH-2_MASLD
		PE_18:0_22:6_FA_18:0*#†	PE	0.0049443	3_MASH-1_HCV; 3_MASH-2_MASLD
		PE_32:1*	PE	0.018356	3_MASH-2_MASLD
		PE_34:1*#	PE	0.0068657	3_MASH-2_MASLD
		PE_34:2	PE	0.0033519	2_MASLD-1_HCV
		PE_34:3	PE	0.022107	2_MASLD-1_HCV
		PE_36:4	PE	0.00023385	2_MASLD-1_HCV; 3_MASH-1_HCV
		PE_38:6*#†	PE	0.0099076	2_MASLD-1_HCV; 3_MASH-2_MASLD
		PE_40:6*#†	PE	0.010938	3_MASH-1_HCV; 3_MASH-2_MASLD
		PE_O-38:5_FA_20:4*	PE	0.039344	2_MASLD-1_HCV; 3_MASH-2_MASLD
		PE_O-38:5_FA_22:5*#	PE	0.04176	3_MASH-2_MASLD
		PE_O-38:6_FA_20:4	PE	0.016091	2_MASLD-1_HCV
		PE_O-38:6_FA_22:5*†	PE	0.0025685	2_MASLD-1_HCV; 3_MASH-2_MASLD
		PE_O-38:7_FA_22:6*†	PE	0.016091	2_MASLD-1_HCV
		PE_O-38:5†	PE	0.036313	3_MASH-2_MASLD
		PE_O-40:6_FA_22:5*#†	PE	0.0031612	2_MASLD-1_HCV; 3_MASH-2_MASLD
		PE_O-40:7_FA_22:5*†	PE	0.007897	2_MASLD-1_HCV; 3_MASH-2_MASLD
		PE_P-16:0_20:5	PE	0.048876	2_MASLD-1_HCV
		PE_P-16:0_22:5*#†	PE	0.0025685	2_MASLD-1_HCV; 3_MASH-2_MASLD
		PE_P-16:0_22:6†	PE	0.032608	2_MASLD-1_HCV
		PE_P-18:0_20:4*	PE	0.021054	2_MASLD-1_HCV; 3_MASH-2_MASLD
		PE_P-18:0_22:5*#†	PE	0.0031612	2_MASLD-1_HCV; 3_MASH-2_MASLD
		PE_P-18:1_22:4*#	PE	0.031589	3_MASH-2_MASLD
		PE_P-18:1_22:5*#†	PE	0.011797	2_MASLD-1_HCV; 3_MASH-2_MASLD
		PI_18:0_18:2_FA_18:2†	PI	0.00081998	2_MASLD-1_HCV; 3_MASH-1_HCV
		PI_18:0_20:3_FA_18:0V†	PI	0.013989	3_MASH-1_HCV
		PI_18:0_20:3_FA_20:3†	PI	0.0033519	3_MASH-1_HCV
		PI_18:0_20:4_FA_20:4†	PI	0.00081998	2_MASLD-1_HCV
		PI_18:0_22:6_FA_22:6*†	PI	0.00057765	2_MASLD-1_HCV; 3_MASH-2_MASLD
		PI_36:2†	PI	0.0068657	2_MASLD-1_HCV; 3_MASH-1_HCV
		PI_38:3*†	PI	0.0031612	3_MASH-1_HCV; 3_MASH-2_MASLD
		PI_38:4†	PI	0.0022632	2_MASLD-1_HCV
		PI_40:6†	PI	0.00099235	2_MASLD-1_HCV
		SM_32:0;O2*†	SM	0.019575	2_MASLD-1_HCV; 3_MASH-2_MASLD
		SM_34:0;O2†	SM	0.00065538	2_MASLD-1_HCV; 3_MASH-1_HCV
		SM_34:1;O2†	SM	0.00081998	2_MASLD-1_HCV
		SM_34:2;O2†	SM	0.026086	2_MASLD-1_HCV
		SM_34:3;O2†	SM	0.002827	2_MASLD-1_HCV
		SM_35:0;O2	SM	0.03324	2_MASLD-1_HCV
		SM_35:2;O2†	SM	0.003833	2_MASLD-1_HCV; 3_MASH-1_HCV
		SM_36:0;O2*#†	SM	0.0013612	3_MASH-1_HCV; 3_MASH-2_MASLD
		SM_36:1;O2†	SM	1.39e-07	2_MASLD-1_HCV; 3_MASH-1_HCV
		SM_36:2;O2†	SM	1.39e-07	2_MASLD-1_HCV; 3_MASH-1_HCV
		SM_36:3;O2V†	SM	9.51e-05	2_MASLD-1_HCV
		SM_36:4;O2†	SM	0.0031087	2_MASLD-1_HCV
		SM_38:0;O2*#†	SM	0.00081998	3_MASH-1_HCV; 3_MASH-2_MASLD
		SM_38:1;O2†	SM	9.26e-08	2_MASLD-1_HCV; 3_MASH-1_HCV
		SM_38:2;O2†	SM	0.00015856	2_MASLD-1_HCV
		SM_40:0;O2*#†	SM	0.0031612	3_MASH-1_HCV; 3_MASH-2_MASLD
		SM_40:1;O2†	SM	0.00023385	2_MASLD-1_HCV; 3_MASH-1_HCV
		SM_40:2;O2*†	SM	1.39e-07	2_MASLD-1_HCV; 3_MASH-1_HCV; 3_MASH-2_MASLD
		SM_40:3;O2†	SM	0.005399	2_MASLD-1_HCV; 3_MASH-1_HCV
		SM_42:1;O2†	SM	0.011797	2_MASLD-1_HCV
		SM_44:2;O2*	SM	0.035386	3_MASH-2_MASLD
		SM_44:3;O2†	SM	0.016049	2_MASLD-1_HCV
		Phospholipids with FDR-adjusted p-values of less than 0.05 for the one-way ANOVA test were listed.
		* indicates significant differences between MASLD and MASH within Cohort 3.
		# indicates significant differences between MASLD and MASH, reproduced in Cohort 2 and Cohort 3.
		† indicates significant differences between HCV and MASH or HCV and MASLD, reproduced in Cohort 2 and Cohort 3.

## Sheet: Table S6-1 
Table S6-1: Triglycerides with differential levels among clinical categories in Cohort 2
	Lipid Name	p-value	FDR-adjusted p-value (BH)	Tukey's HSD
	TG_49:1-FA_15:0	0.005021	0.095572	2_MASLD-1_HCV
	TG_50:3-FA_18:1	0.0054034	0.095572	3_MASH-1_HCV
	TG_50:4-FA_18:2*	0.0059662	0.095572	3_MASH-1_HCV; 3_MASH-2_MASLD
	TG_51:1-FA_16:0*	0.0090954	0.095572	3_MASH-2_MASLD
	TG_51:3-FA_18:2	0.0084365	0.095572	3_MASH-1_HCV
	TG_52:2-FA_16:0	0.0045272	0.095572	2_MASLD-1_HCV; 3_MASH-1_HCV
	TG_52:3-FA_16:0*#	0.0074115	0.095572	2_MASLD-1_HCV; 3_MASH-2_MASLD
	TG_52:4-FA_16:0*#	0.0071785	0.095572	3_MASH-2_MASLD
	TG_52:4-FA_18:2*#	0.0090496	0.095572	3_MASH-2_MASLD
	TG_52:5-FA_18:2*#	0.0075386	0.095572	3_MASH-2_MASLD
	TG_54:5-FA_18:2*#	0.0046929	0.095572	3_MASH-1_HCV; 3_MASH-2_MASLD
	TG_54:6-FA_18:2*#	0.01008	0.095572	3_MASH-1_HCV; 3_MASH-2_MASLD
	TG_54:6-FA_18:3*	0.010136	0.095572	3_MASH-1_HCV; 3_MASH-2_MASLD
	TG_54:6-FA_22:6*	0.0066208	0.095572	3_MASH-2_MASLD
	TG_50:2-FA_16:1*	0.015754	0.099022	3_MASH-2_MASLD
	TG_50:2-FA_18:1*#	0.015328	0.099022	2_MASLD-1_HCV; 3_MASH-2_MASLD
	TG_51:2-FA_18:1	0.013814	0.099022	2_MASLD-1_HCV
	TG_52:1-FA_16:0	0.014598	0.099022	3_MASH-1_HCV
	TG_52:3-FA_18:2*#	0.012246	0.099022	3_MASH-2_MASLD
	TG_54:4-FA_18:2*	0.012608	0.099022	3_MASH-1_HCV; 3_MASH-2_MASLD
	TG_54:5-FA_18:1*	0.012931	0.099022	3_MASH-1_HCV; 3_MASH-2_MASLD
	TG_49:1-FA_18:1	0.016525	0.099152	2_MASLD-1_HCV
	TG_49:1-FA_16:0*	0.018113	0.09962	3_MASH-2_MASLD
	TG_51:2-FA_16:0*	0.017389	0.09962	3_MASH-2_MASLD
	TG_48:1-FA_16:1*	0.019663	0.099829	3_MASH-2_MASLD
	TG_54:5-FA_16:0	0.019216	0.099829	3_MASH-1_HCV
	Triglyderides with FDR-adjusted p-values of less than 0.05 for the one-way ANOVA test were listed.
	* indicates significant differences between MASLD and MASH within Cohort 2.
	# indicates significant differences between MASLD and MASH, reproduced in Cohort 2 and Cohort 3.

## Sheet: Table S6-2
Table S6-2: Triglycerides with differential levels among clinical categories in Cohort 3
	Lipid Name	p-value	FDR-adjusted p-value (BH)	Tukey's HSD
	TG_52:1-FA_16:0	0.00072563	0.037284	2_MASLD-1_HCV; 3_MASH-1_HCV
	TG_52:4-FA_16:0*#	0.0014123	0.037284	3_MASH-1_HCV; 3_MASH-2_MASLD
	TG_52:4-FA_18:2*#	0.0012962	0.037284	3_MASH-1_HCV; 3_MASH-2_MASLD
	TG_54:5-FA_18:2*#	0.0013755	0.037284	3_MASH-1_HCV; 3_MASH-2_MASLD
	TG_54:6-FA_18:2*#	0.0012903	0.037284	3_MASH-1_HCV; 3_MASH-2_MASLD
	TG_50:4-FA_18:2	0.0074222	0.061233	3_MASH-1_HCV
	TG_51:2-FA_17:1*	0.0069619	0.061233	3_MASH-1_HCV; 3_MASH-2_MASLD
	TG_51:3-FA_18:2	0.0072117	0.061233	3_MASH-1_HCV
	TG_52:1-FA_18:0	0.0071698	0.061233	2_MASLD-1_HCV; 3_MASH-1_HCV
	TG_52:1-FA_18:1	0.0038554	0.061233	2_MASLD-1_HCV; 3_MASH-1_HCV
	TG_52:3-FA_16:0*#	0.0068719	0.061233	3_MASH-2_MASLD
	TG_52:3-FA_18:2*#	0.0036288	0.061233	3_MASH-2_MASLD
	TG_52:5-FA_18:2*#	0.003481	0.061233	3_MASH-1_HCV; 3_MASH-2_MASLD
	TG_54:1-FA_18:1	0.0054819	0.061233	2_MASLD-1_HCV; 3_MASH-1_HCV
	TG_54:2-FA_18:1	0.0065008	0.061233	3_MASH-1_HCV
	TG_56:7-FA_20:4*	0.0070529	0.061233	3_MASH-2_MASLD
	TG_52:2-FA_18:2	0.0099552	0.069163	2_MASLD-1_HCV
	TG_54:1-FA_18:0	0.0098186	0.069163	2_MASLD-1_HCV; 3_MASH-1_HCV
	TG_54:2-FA_20:1*	0.0099083	0.069163	3_MASH-1_HCV; 3_MASH-2_MASLD
	TG_54:2-FA_16:0*	0.010591	0.069897	3_MASH-1_HCV; 3_MASH-2_MASLD
	TG_48:2-FA_16:1*	0.014753	0.081142	2_MASLD-1_HCV; 3_MASH-2_MASLD
	TG_50:3-FA_18:1	0.014698	0.081142	2_MASLD-1_HCV; 3_MASH-1_HCV
	TG_50:3-FA_18:2	0.014162	0.081142	3_MASH-1_HCV
	TG_52:4-FA_18:1	0.012992	0.081142	3_MASH-1_HCV
	TG_51:2-FA_18:1	0.018707	0.096407	2_MASLD-1_HCV
	TG_54:7-FA_18:2*	0.018989	0.096407	3_MASH-2_MASLD
	TG_50:2-FA_18:1*#	0.020424	0.099852	3_MASH-2_MASLD
	Triglyderides with FDR-adjusted p-values of less than 0.05 for the one-way ANOVA test were listed.
	* indicates significant differences between MASLD and MASH within Cohort 3.
	# indicates significant differences between MASLD and MASH, reproduced in Cohort 2 and Cohort 3.

## Sheet: TableS7
Table S7: Triglycerides with differential levels in HCV reproduced in Cohort 2 and Cohort 3
	Lipid Name	p-value Cohort2	p-value Cohort3	FDR-adjusted p-value (BH) Cohort 2	FDR-adjusted p-value (BH) Cohort 3	Tukey's HSD Cohort 2	Tukey's HSD Cohort 3	TG Name Species level	Containing fatty chain
	TG_50:3-FA_18:1	0.0054034	0.014698	0.095572	0.081142	3_MASH-1_HCV	2_MASLD-1_HCV; 3_MASH-1_HCV	TG_50:3	FA_18:1
	TG_50:4-FA_18:2	0.0059662	0.0074222	0.095572	0.061233	3_MASH-1_HCV; 3_MASH-2_MASLD	3_MASH-1_HCV	TG_50:4	FA_18:2
	TG_51:2-FA_18:1	0.013814	0.018707	0.099022	0.096407	2_MASLD-1_HCV	2_MASLD-1_HCV	TG_51:2	FA_18:1
	TG_51:3-FA_18:2	0.0084365	0.0072117	0.095572	0.061233	3_MASH-1_HCV	3_MASH-1_HCV	TG_51:3	FA_18:2
	TG_52:1-FA_16:0	0.014598	0.00072563	0.099022	0.037284	3_MASH-1_HCV	2_MASLD-1_HCV; 3_MASH-1_HCV	TG_52:1	FA_16:0
	Triglycerides with FDR-adjusted p-values of less than 0.05 for the one-way ANOVA test and which showed siginificant change with Tukey's HSD post hoc test between HCV and MASLD or HCV and MASH were listed.

## Sheet: TableS8
Table S8: Protein-lipid correlations
	Protein	Lipid showing correlation with the protein	Lipid Class	Pearson's r (Cohort 2)	Pearson's r (Cohort 3)	Pearson's p (Cohort 2)	Pearson's p (Cohort 3)
	CCL20	LPE_20:4	PE	-0.262174	-0.311532	0.00094558	1.35e-05
	CCL20	TG_52:3-FA_16:0	TG	-0.259949	-0.30914	0.0010485	1.58e-05
	CCL20	TG_52:3-FA_18:2	TG	-0.259285	-0.310095	0.0010812	1.49e-05
	CCL20	PC_18:2_20:4	PC	-0.246432	-0.309887	0.0019277	1.51e-05
	CCL20	TG_52:4-FA_18:2	TG	-0.240232	-0.21402	0.0025216	0.0031862
	CCL20	LPC_18:2	PC	-0.232292	-0.335171	0.0035227	2.58e-06
	CCL20	PE_P-16:0_22:5	PE	-0.214331	-0.250779	0.0072149	0.00051811
	CCL20	PE_P-18:1_22:4	PE	-0.213827	-0.225569	0.0073558	0.0018555
	CCL20	TG_52:4-FA_16:0	TG	-0.209011	-0.21166	0.0088306	0.0035467
	CCL20	PE_P-16:0_22:5	PE	-0.203242	-0.232765	0.010938	0.0013067
	CCL20	PE_34:1	PE	0.219098	0.323406	0.0059961	5.98e-06
	CCL20	PC_33:1	TG	0.294931	0.295828	0.00018583	3.76e-05
	CTSD	LPC_18:2_FA_18:0	PC	-0.433003	-0.38909	1.65e-08	3.42e-08
	CTSD	LPC_18:2	PC	-0.398968	-0.349546	2.48e-07	8.8e-07
	CTSD	PE_O-40:6_FA_22:5	PE	-0.361662	-0.316056	3.5e-06	9.94e-06
	CTSD	PC_18:2_20:4	PC	-0.360692	-0.268362	3.74e-06	0.00019641
	CTSD	PE_P-16:0_22:5	PE	-0.345295	-0.298205	1.01e-05	3.23e-05
	CTSD	PE_P-18:0_22:5	PE	-0.339475	-0.282665	1.45e-05	8.48e-05
	CTSD	PE_P-18:1_22:5	PE	-0.328742	-0.359758	2.79e-05	3.96e-07
	CTSD	PE_O-38:6_FA_22:5	PE	-0.328626	-0.27388	2.81e-05	0.00014285
	CTSD	TG_54:5-FA_18:2	TG	-0.318283	-0.337759	5.14e-05	2.13e-06
	CTSD	TG_52:4-FA_18:2	TG	-0.310279	-0.358368	8.08e-05	4.43e-07
	CTSD	LPE_20:4	PE	-0.303297	-0.237078	0.00011871	0.0010536
	CTSD	TG_52:4-FA_16:0	TG	-0.297307	-0.353681	0.00016384	6.39e-07
	CTSD	TG_52:3-FA_18:2	TG	-0.29284	-0.389752	0.00020741	3.23e-08
	CTSD	TG_52:5-FA_18:2	TG	-0.292815	-0.300809	0.00020768	2.73e-05
	CTSD	PE_P-18:1_22:4	PE	-0.282588	-0.26012	0.00035121	0.00031209
	CTSD	TG_52:3-FA_16:0	TG	-0.280759	-0.37878	0.00038499	8.32e-08
	CTSD	TG_54:6-FA_18:2	TG	-0.262428	-0.310295	0.00093439	1.47e-05
	CTSD	PC_O-34:3	PC	-0.223812	-0.304937	0.0049749	2.09e-05
	CTSD	PE_38:6	PE	0.277769	0.272795	0.00044679	0.00015216
	CTSD	PC_36:1	PC	0.302326	0.348196	0.00012514	9.76e-07
	CTSD	PC_33:1	PC	0.368482	0.343869	2.21e-06	1.35e-06
	CTSD	PE_34:1	PE	0.37292	0.410332	1.63e-06	4.97e-09
	MMP-3	PE_16:0_22:6_FA_16:0	PE	-0.322748	-0.202097	3.97e-05	0.0054143
	MMP-3	PE_40:6	PE	-0.288941	-0.21164	0.00025401	0.00355
	MMP-3	PE_18:0_22:6_FA_18:0	PE	-0.287895	-0.223884	0.00026806	0.0020112
	MMP-3	LPC_18:2	PC	0.226886	0.204871	0.004396	0.004798
	SCF	TG_50:2-FA_18:1	TG	-0.272265	-0.254949	0.00058511	0.00041415
	SCF	PE_34:1	PE	-0.266807	-0.348041	0.0007603	9.87e-07
	SCF	PC_36:1	PC	-0.204308	-0.276553	0.010518	0.00012213
	SCF	PC_33:1	PC	-0.202854	-0.290959	0.011094	5.1e-05
	SCF	PE_P-18:1_22:5	PE	0.209149	0.271734	0.008785	0.00016181
	SCF	LPC_18:2	PC	0.346699	0.22246	9.26e-06	0.002152
	SCF	PC_18:2_FA_18:0	PC	0.362006	0.233598	3.42e-06	0.0012539
	Correlations between proteins and lipids that are significantly variable across Cohort 2 and Cohort 3 (Figure 1, Table 2 and Table 4). Protein-lipid correlations of peason's correlation r-values more than 0.2 absolute value and p-values less than 0.01 in Cohort 2 and Cohort 3 were listed.

[truncated: 4 more sheets: TableS9, TableS10, TableS11, TableS12]
